# Supplementary material for: Identifying loci under positive selection in complex population histories
Source: HighWire-hosted journal article supplement (doi:10.1101/gr.246777.118), 2019-07-30
Supplement: Supplemental_Materials.pdf [file Supplemental_Materials.pdf]

## Supplemental Figures

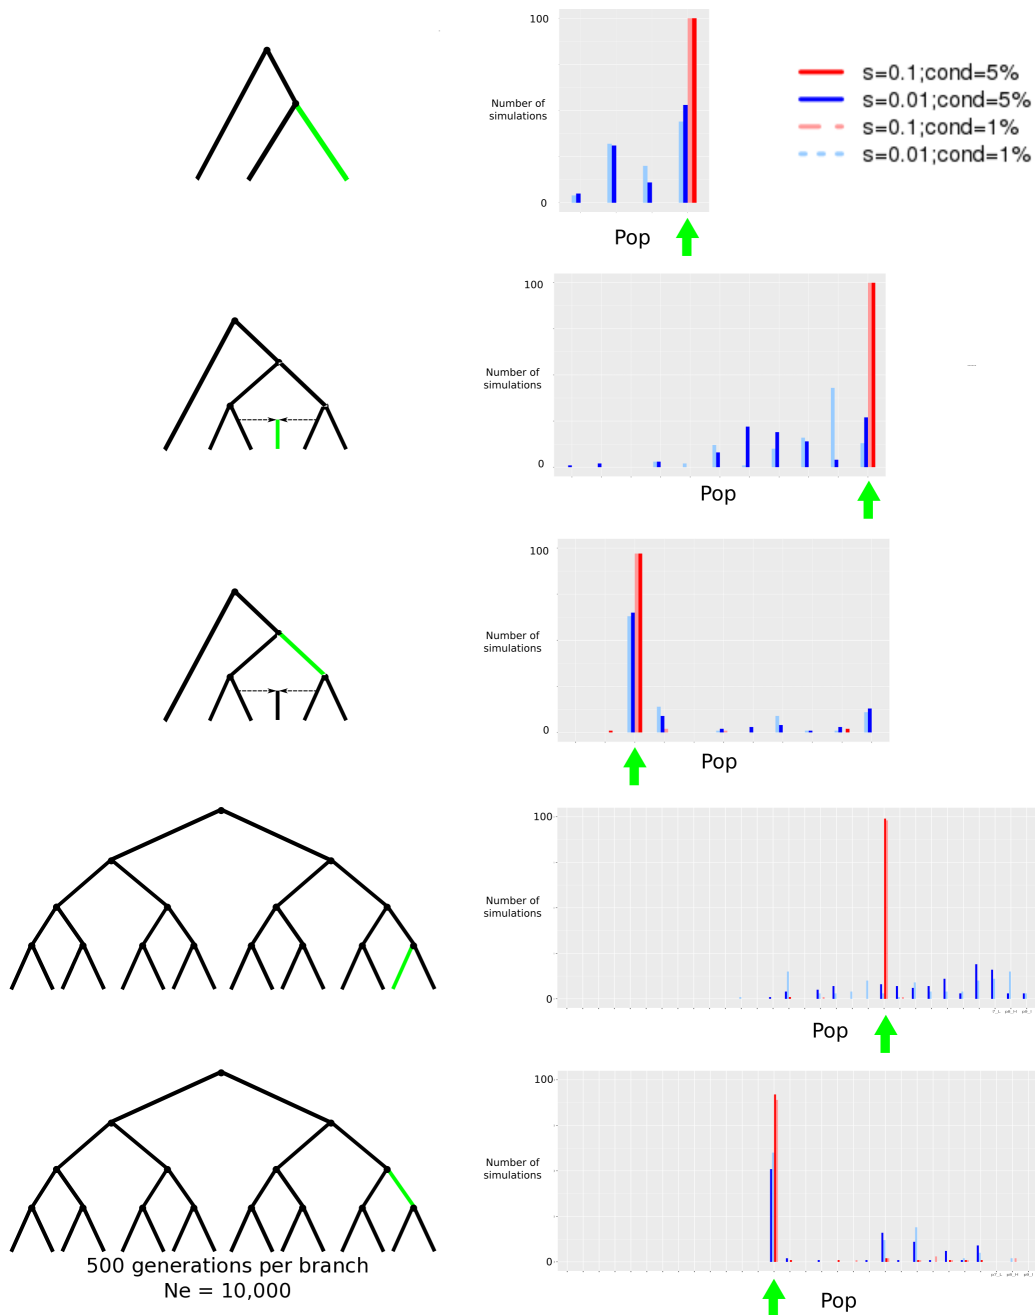

Figure S1: Evaluation of *GROSS* performance using simulations in *SLiM 2*, with 50 diploid individuals per population panel. We simulated different selective sweeps under strong ( $s=0.1$ ) and intermediate ( $s=0.01$ ) selection coefficients for a 3-population tree, a 6-population graph with a 50%/50% admixture event and a 16-population tree. We obtained the maximum branch score within 100kb of the selected site, and computed the number of simulations (out of 100) in which the branch of this score corresponded to the true branch in which the selected mutation arose (highlighted in green). " $cond = 5\%$ ": Simulations conditional on the beneficial mutation reaching 5% frequency or more. " $cond = 1\%$ ": Simulations conditional on the beneficial mutation reaching 1% frequency or more. "Pop": population branch. The green arrow denotes the values of the statistic corresponding to the branch in which the selected mutation arose.

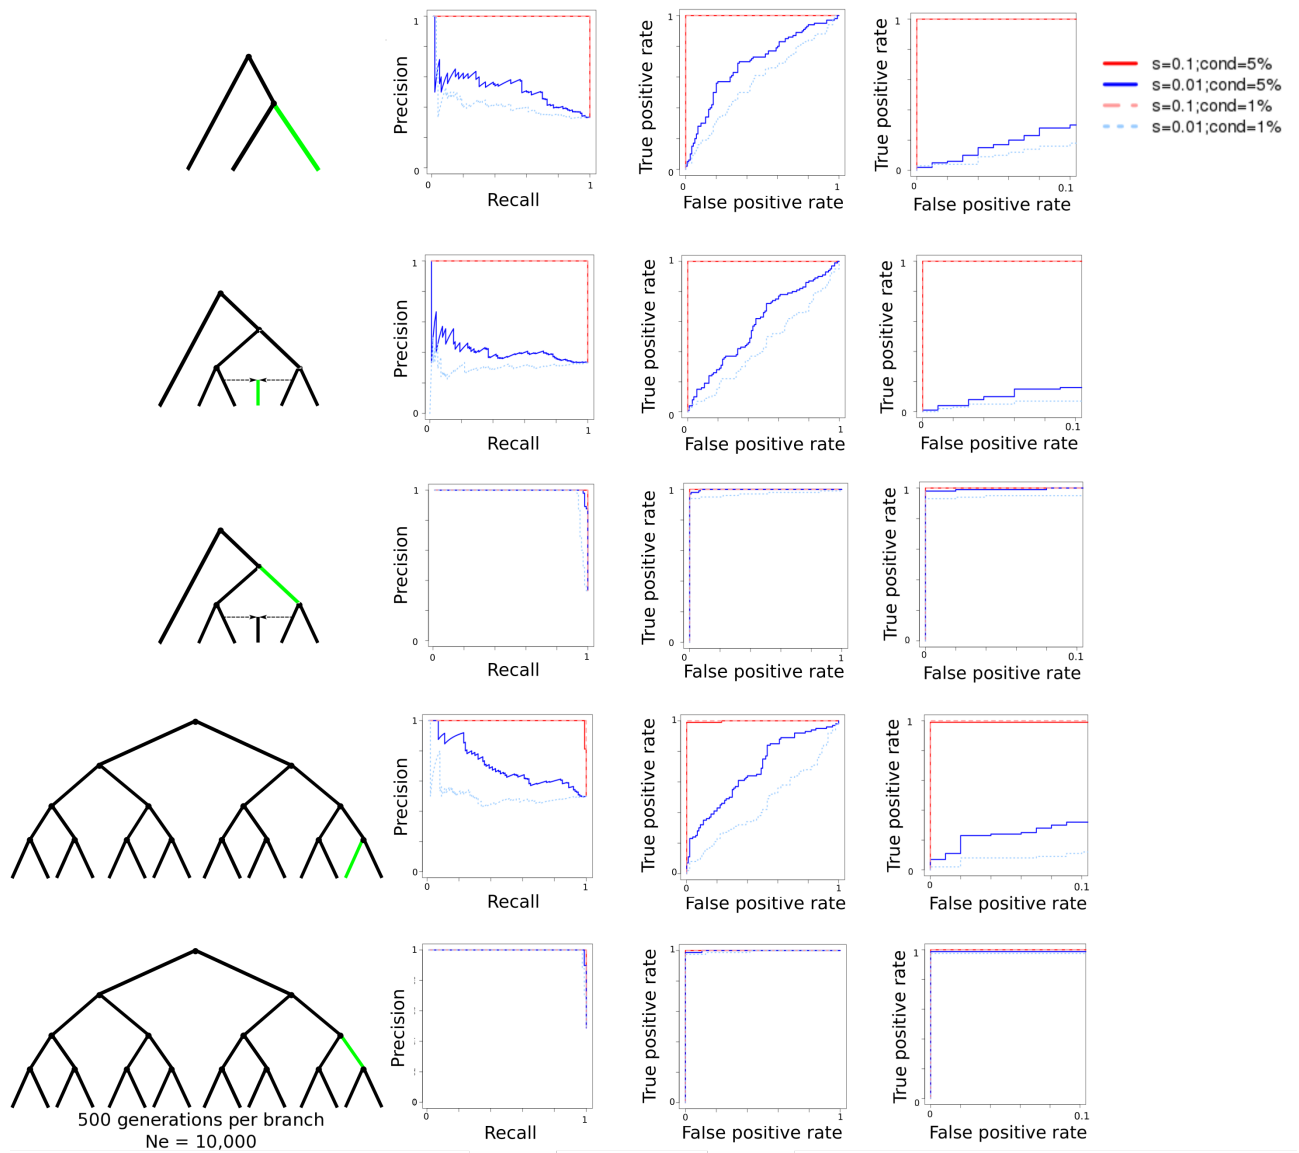

Figure S2: Evaluation of *GROSS* performance using simulations in *SLiM 2*, with 50 diploid individuals per population panel. We produced precision-recall (left panel) and ROC curves (center and right panels) comparing simulations under selection to simulations under neutrality for a 3-population tree, a 6-population graph with a 50%/50% admixture event and a 16-population tree. The right-most ROC curves are a zoomed-in version of the center ROC curves, in which the false positive rate is limited to be equal to or less than 0.1.

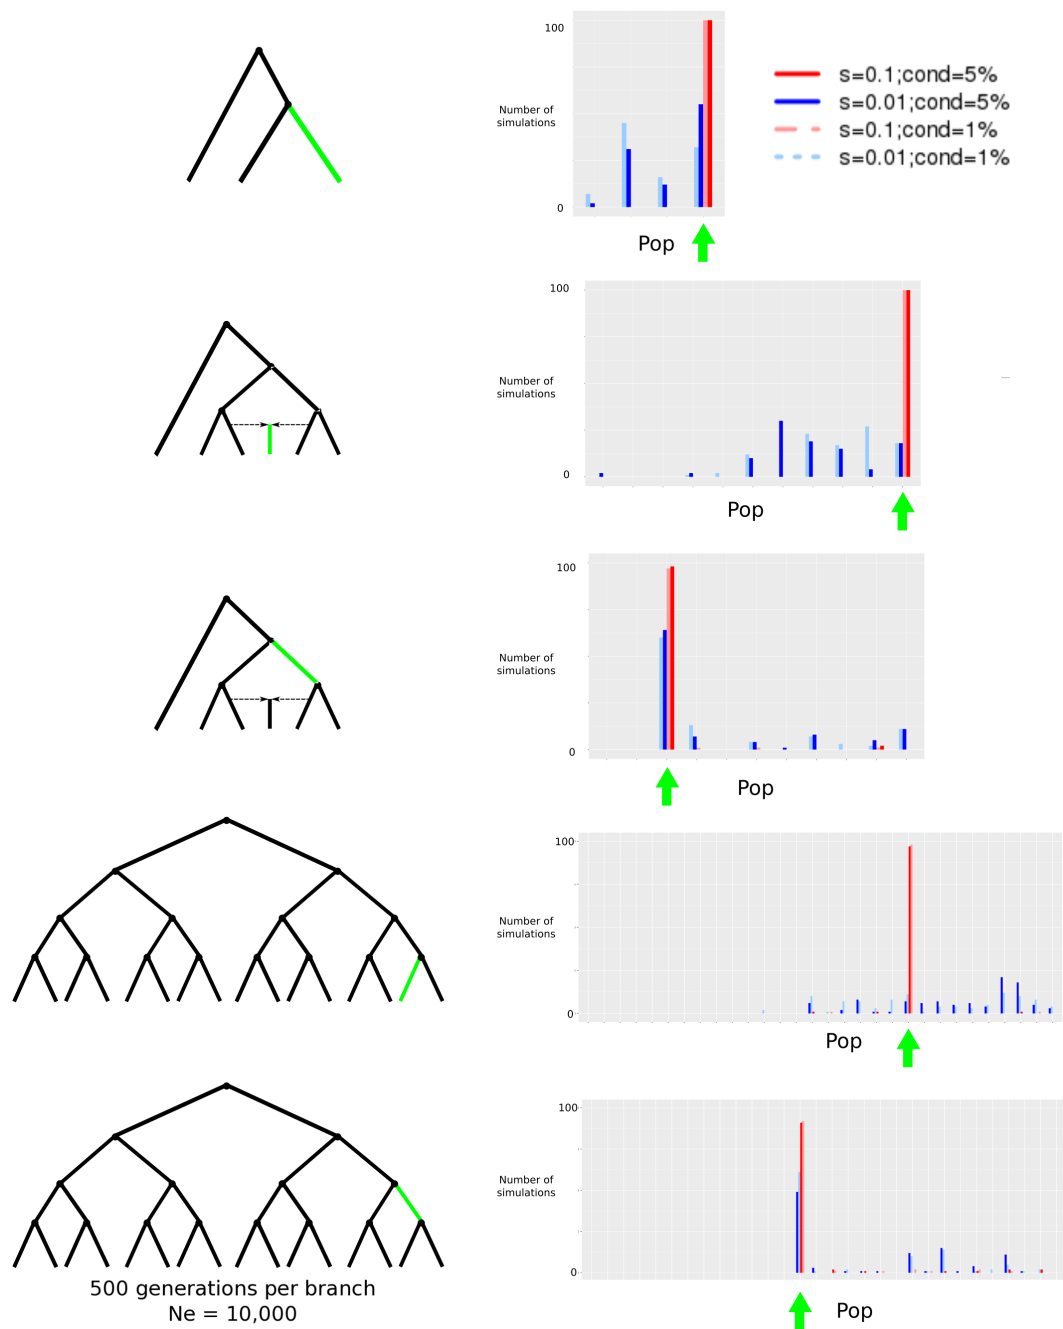

Figure S3: Evaluation of *GROSS* performance using simulations in *SLiM 2*, with 25 diploid individuals per population panel. Unless otherwise stated, we simulated different selective sweeps under strong ( $s=0.1$ ) and intermediate ( $s=0.01$ ) selection coefficients for a 3-population tree, a 6-population graph with a 50%/50% admixture event and a 16-population tree. We obtained the maximum branch score within 100kb of the selected site, and computed the number of simulations (out of 100) in which the branch of this score corresponded to the true branch in which the selected mutation arose (highlighted in green). "*cond* = 5%": Simulations conditional on the beneficial mutation reaching 5% frequency or more. "*cond* = 1%": Simulations conditional on the beneficial mutation reaching 1% frequency or more. "Pop": population branch. The green arrow denotes the values of the statistic corresponding to the branch in which the selected mutation arose.

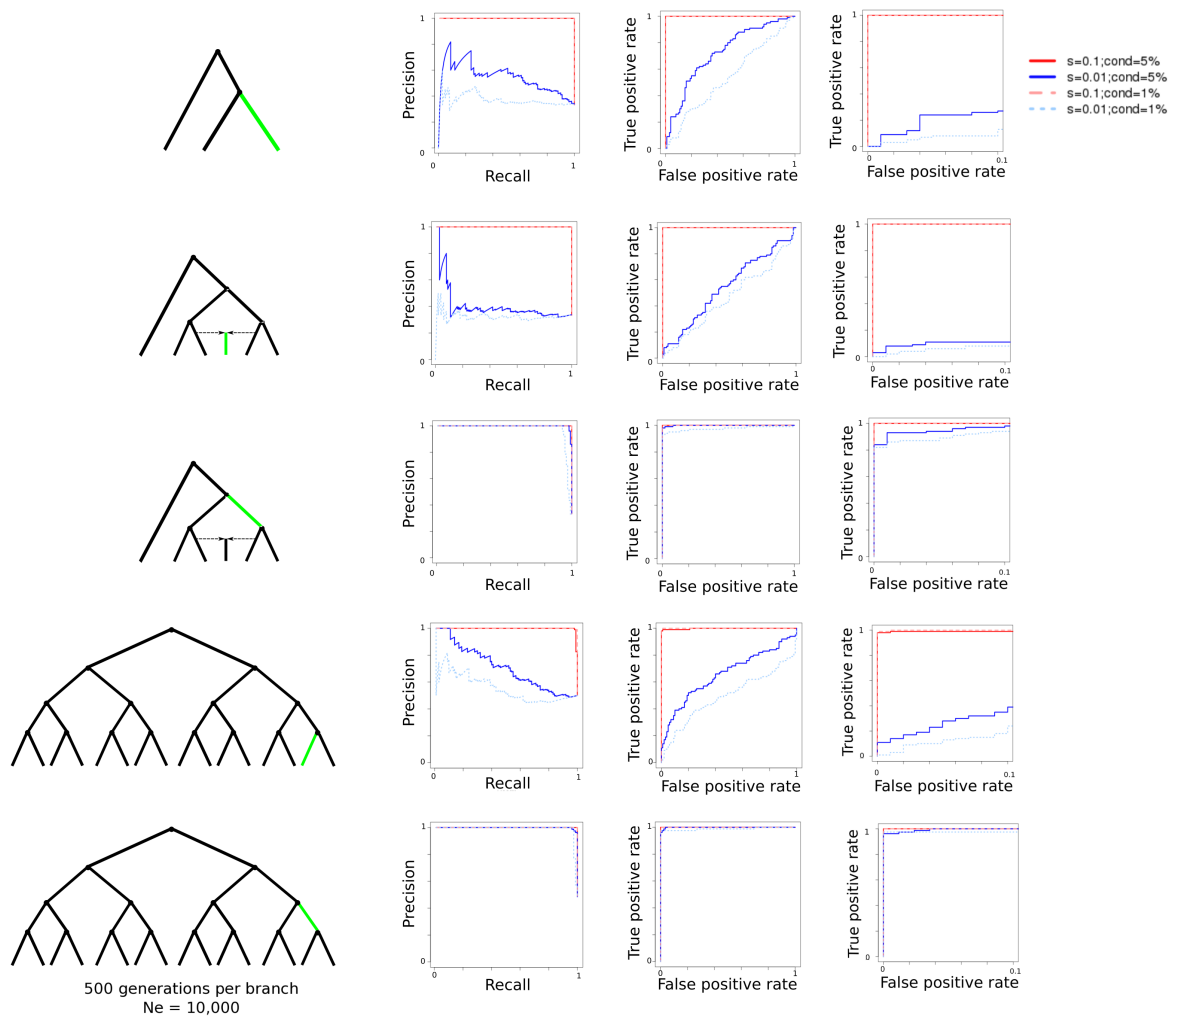

Figure S4: Evaluation of *GROSS* performance using simulations in *SLiM 2*, with 25 diploid individuals per population panel. We produced precision-recall (left panel) and ROC curves (center and right panels) comparing simulations under selection to simulations under neutrality for a 3-population tree, a 6-population graph with a 50%/50% admixture event and a 16-population tree. The right-most ROC curves are a zoomed-in version of the center ROC curves, in which the false positive rate is limited to be equal to or less than 0.1.

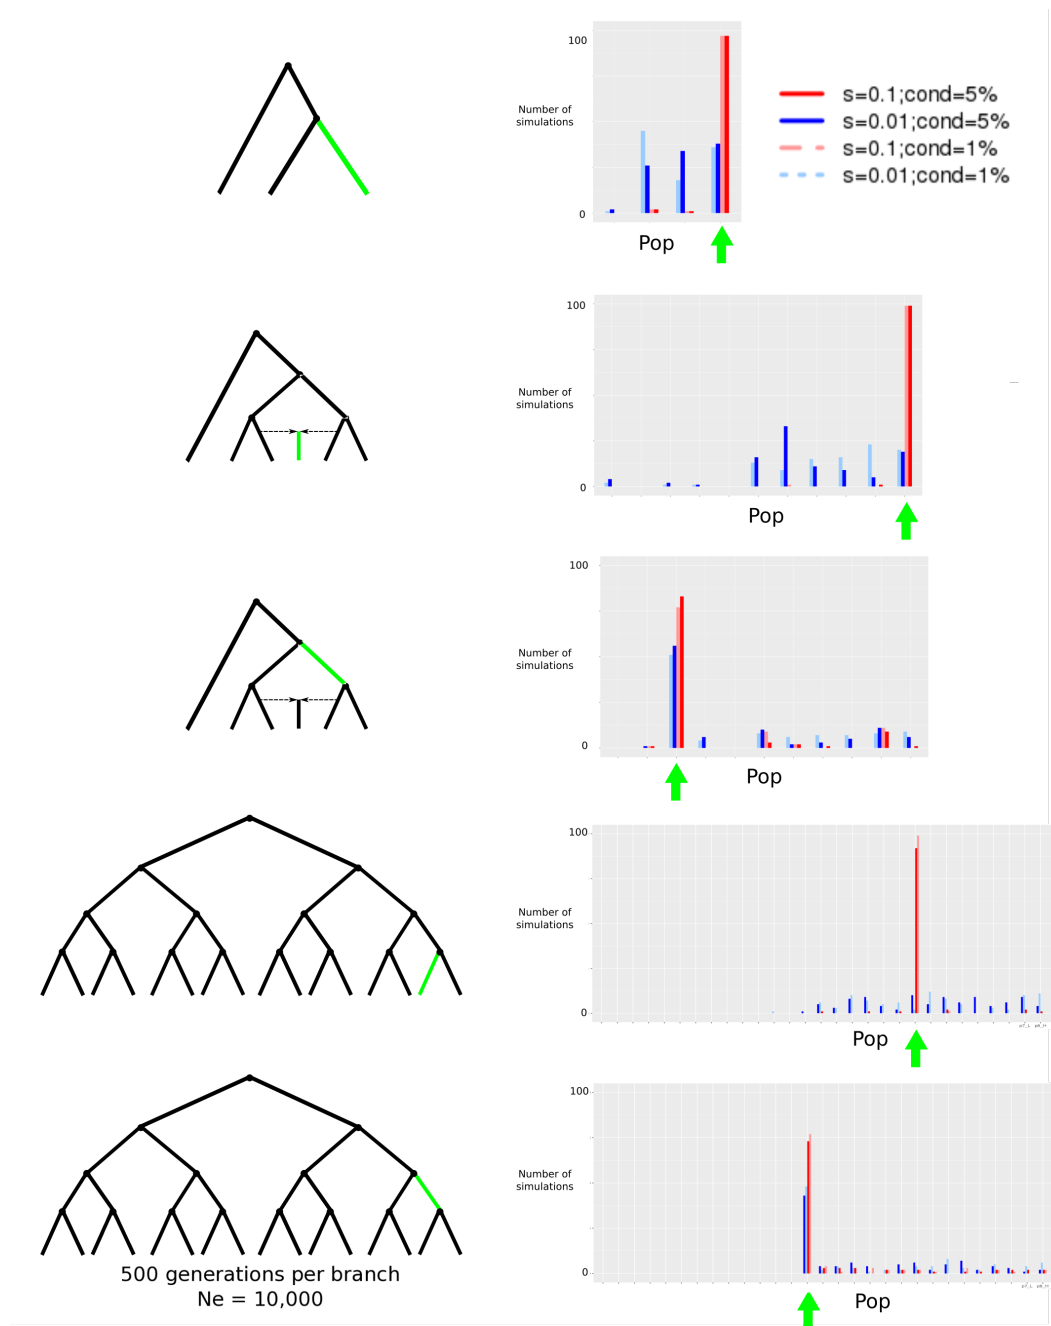

Figure S5: Evaluation of *GROSS* performance using simulations in *SLiM 2*, with 4 diploid individuals per population panel. We simulated different selective sweeps under strong ( $s=0.1$ ) and intermediate ( $s=0.01$ ) selection coefficients for a 3-population tree, a 6-population graph with a 50%/50% admixture event and a 16-population tree. We obtained the maximum branch score within 100kb of the selected site, and computed the number of simulations (out of 100) in which the branch of this score corresponded to the true branch in which the selected mutation arose (highlighted in green). "*cond* = 5%": Simulations conditional on the beneficial mutation reaching 5% frequency or more. "*cond* = 1%": Simulations conditional on the beneficial mutation reaching 1% frequency or more. "Pop": population branch. The green arrow denotes the values of the statistic corresponding to the branch in which the selected mutation arose.

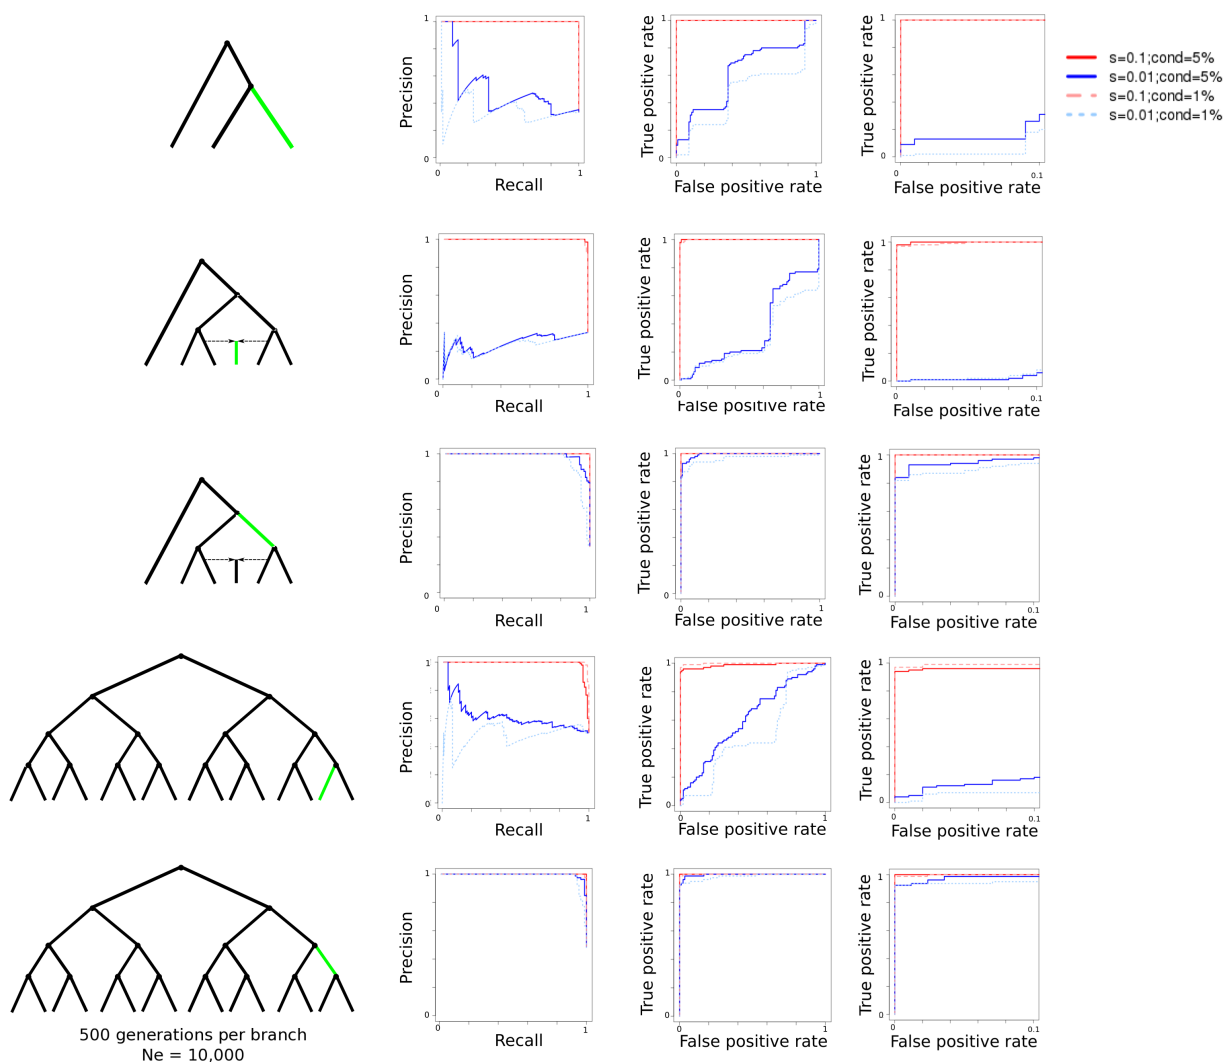

Figure S6: Evaluation of *GROSS* performance using simulations in *SLiM 2*, with 4 diploid individuals per population panel. We produced precision-recall (left panel) and ROC curves (center and right panels) comparing simulations under selection to simulations under neutrality for a 3-population tree, a 6-population graph with a 50%/50% admixture event and a 16-population tree. The right-most ROC curves are a zoomed-in version of the center ROC curves, in which the false positive rate is limited to be equal to or less than 0.1.

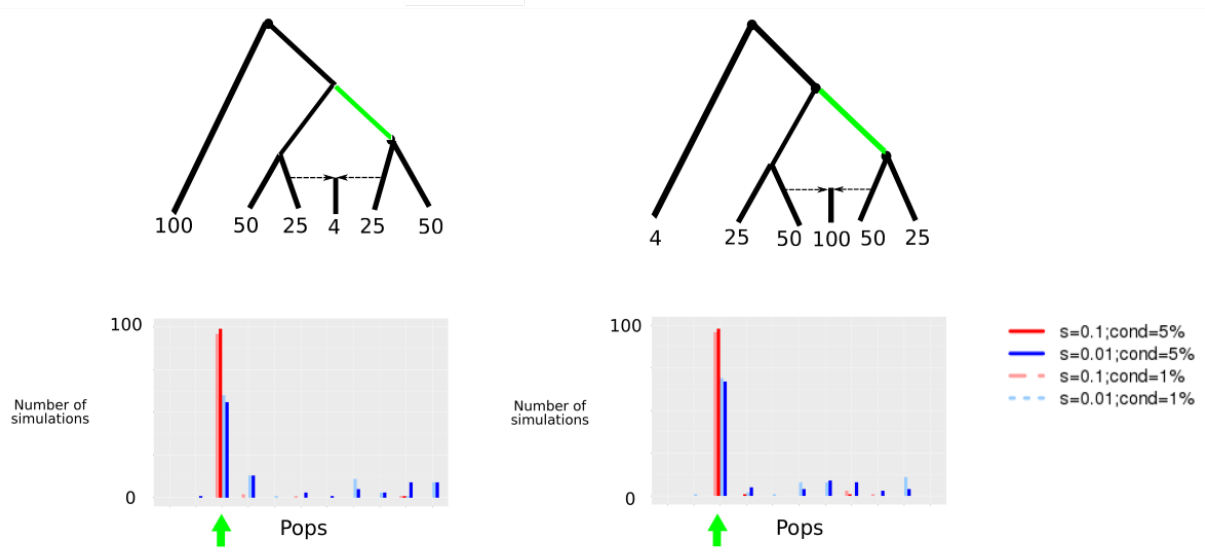

Figure S7: We compared simulations under different selection coefficients,  $s$ , and minimum mutation establishment,  $cond$ , for two scenarios in which we sampled different numbers of individuals from each of the leaf populations. For each of the 100 simulations under each scenario, we obtained the maximum branch score within 100kb of the selected site, and computed the number of simulations (out of 100) in which the branch of this score corresponded to the true branch in which the selected mutation arose (highlighted in green). The green arrow denotes the values of the statistic corresponding to the branch in which the selected mutation arose.

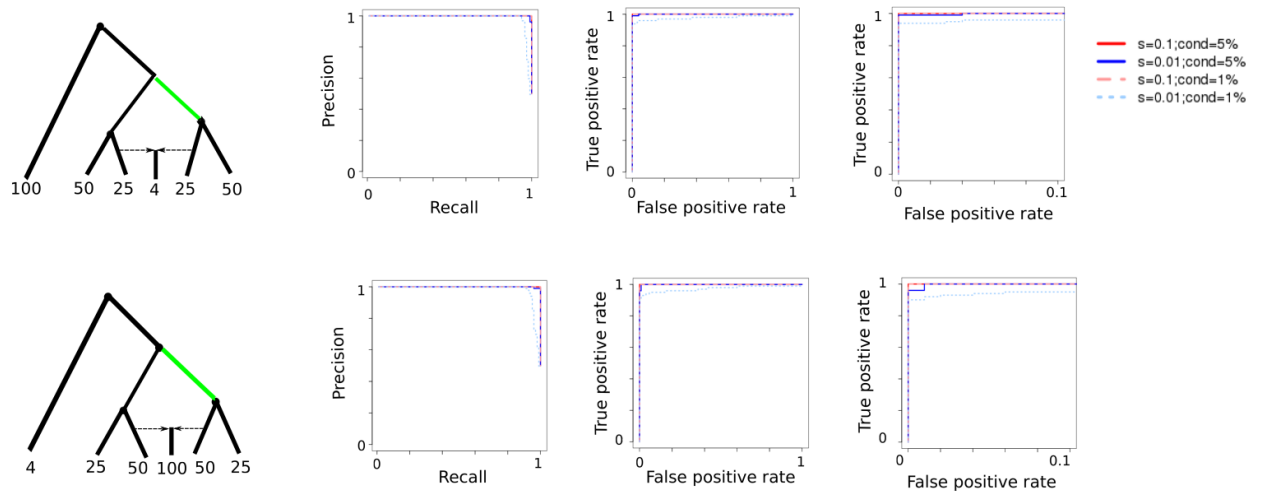

Figure S8: We produced precision-recall (left panel) and ROC curves (center and right panels) comparing simulations under selection to simulations under neutrality for two scenarios in which we sampled different numbers of individuals from each of the leaf populations. The right-most ROC curves are a zoomed-in version of the center ROC curves, in which the false positive rate is limited to be equal to or less than 0.1.

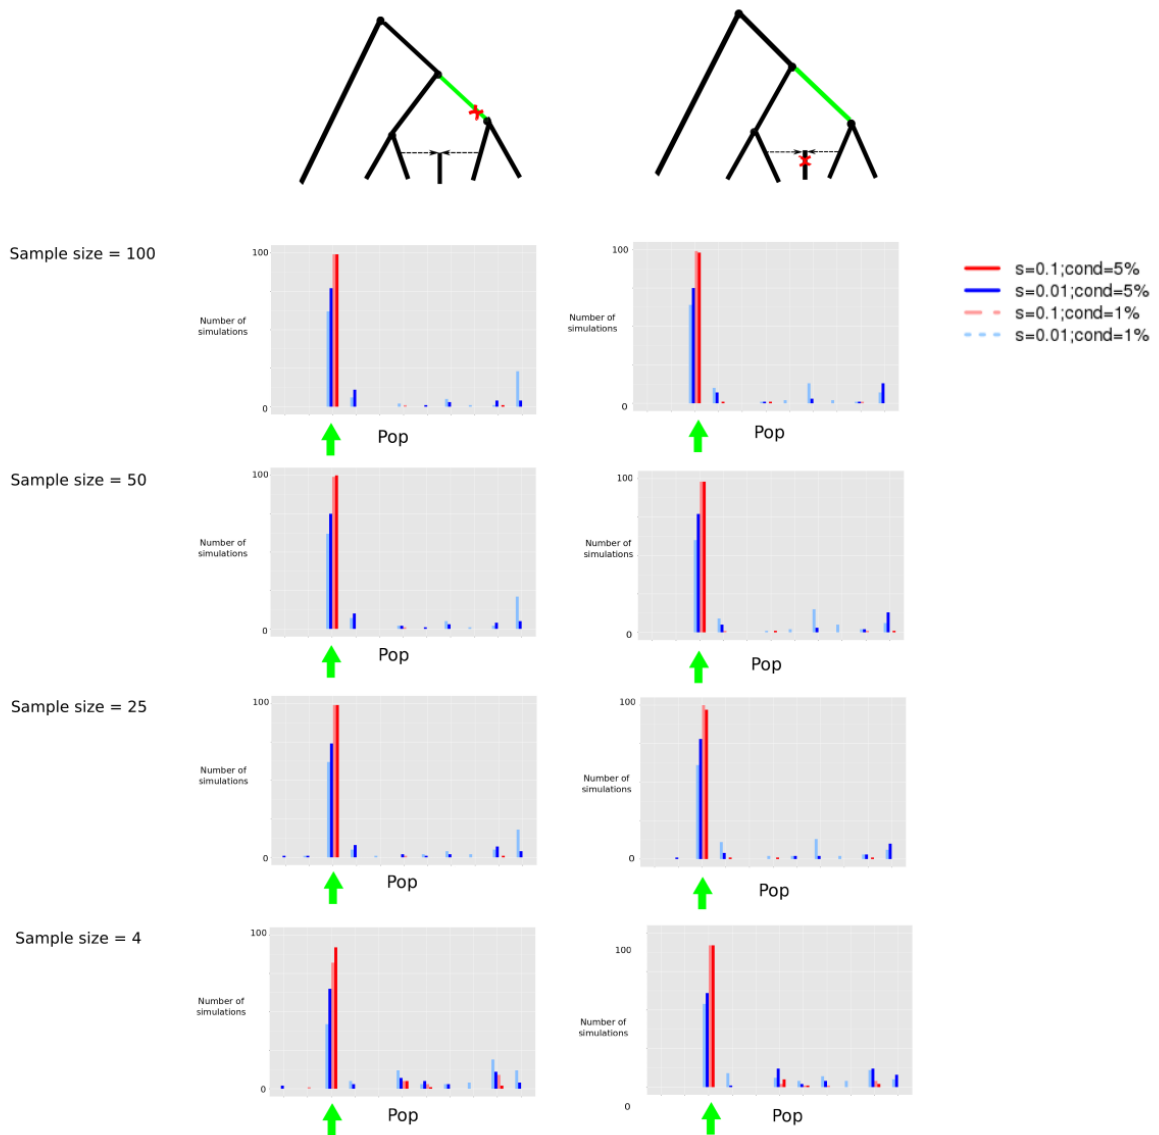

Figure S9: We compared simulations under different selection coefficients,  $s$ , and minimum mutation establishment,  $cond$ , for two scenarios in which we simulated a 5X bottleneck lasting 10 generations (red cross) in different branches of a 6-population graph. For each of the 100 simulations under each scenario, we obtained the maximum branch score within 100kb of the selected site, and computed the number of simulations (out of 100) in which the branch of this score corresponded to the true branch in which the selected mutation arose (highlighted in green). The green arrow denotes the values of the statistic corresponding to the branch in which the selected mutation arose.



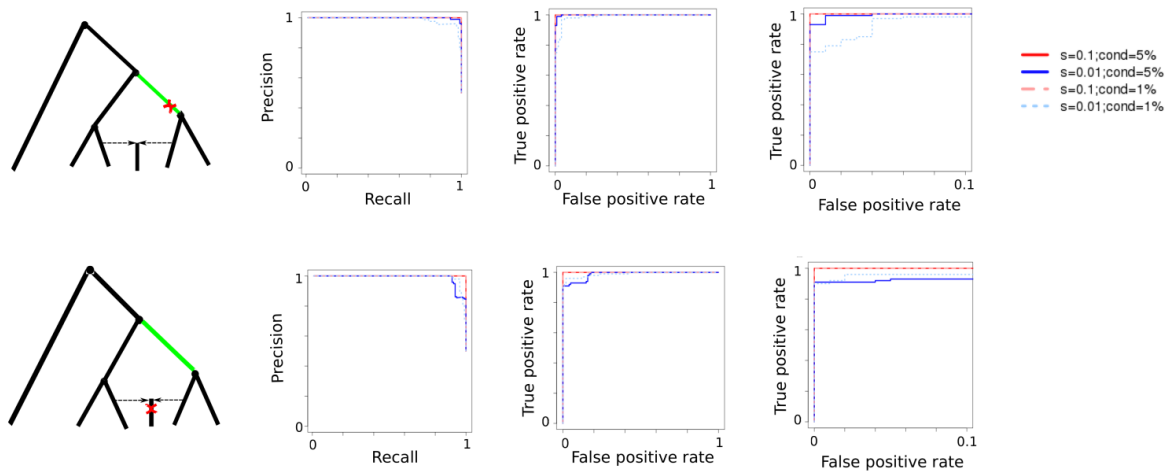

Figure S10: We produced precision-recall (left panel) and ROC curves (center and right panels) comparing simulations under selection to simulations under neutrality for two scenarios in which we simulated a 5X bottleneck lasting 10 generations (red cross) in different branches of a 6-population graph. The sample size for each leaf population was 100 diploid genomes.

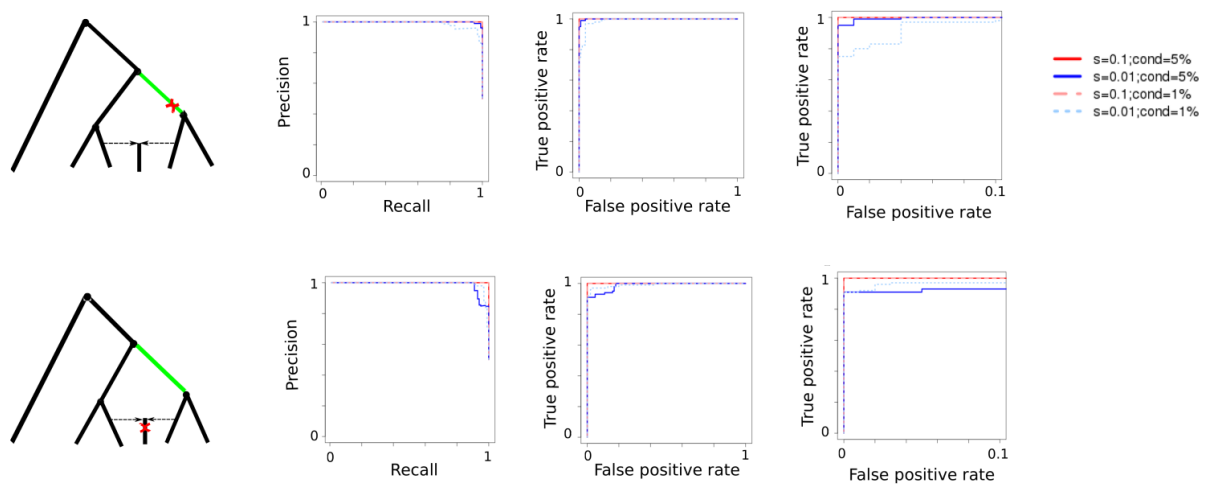

Figure S11: We produced precision-recall (left panel) and ROC curves (center and right panels) comparing simulations under selection to simulations under neutrality for two scenarios in which we simulated a 5X bottleneck lasting 10 generations (red cross) in different branches of a 6-population graph. The sample size for each leaf population was 50 diploid genomes.

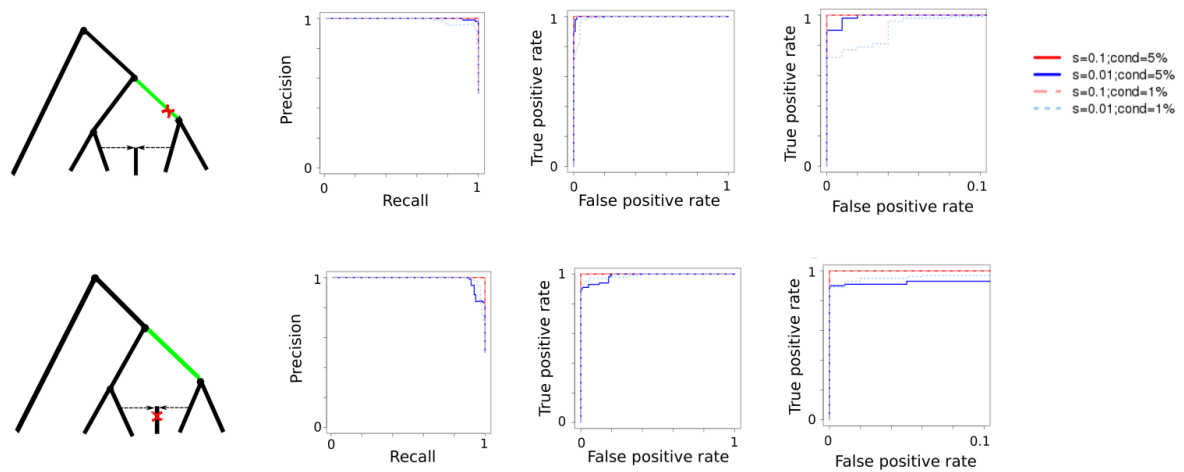

Figure S12: We produced precision-recall (left panel) and ROC curves (center and right panels) comparing simulations under selection to simulations under neutrality for two scenarios in which we simulated a 5X bottleneck lasting 10 generations (red cross) in different branches of a 6-population graph. The sample size for each leaf population was 25 diploid genomes.

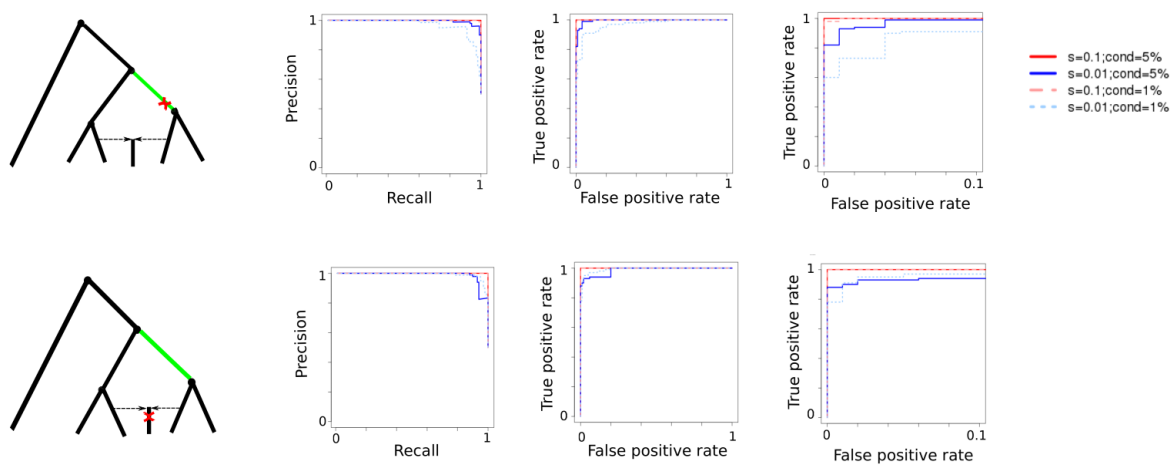

Figure S13: We produced precision-recall (left panel) and ROC curves (center and right panels) comparing simulations under selection to simulations under neutrality for two scenarios in which we simulated a 5X bottleneck lasting 10 generations (red cross) in different branches of a 6-population graph. The sample size for each leaf population was 4 diploid genomes.

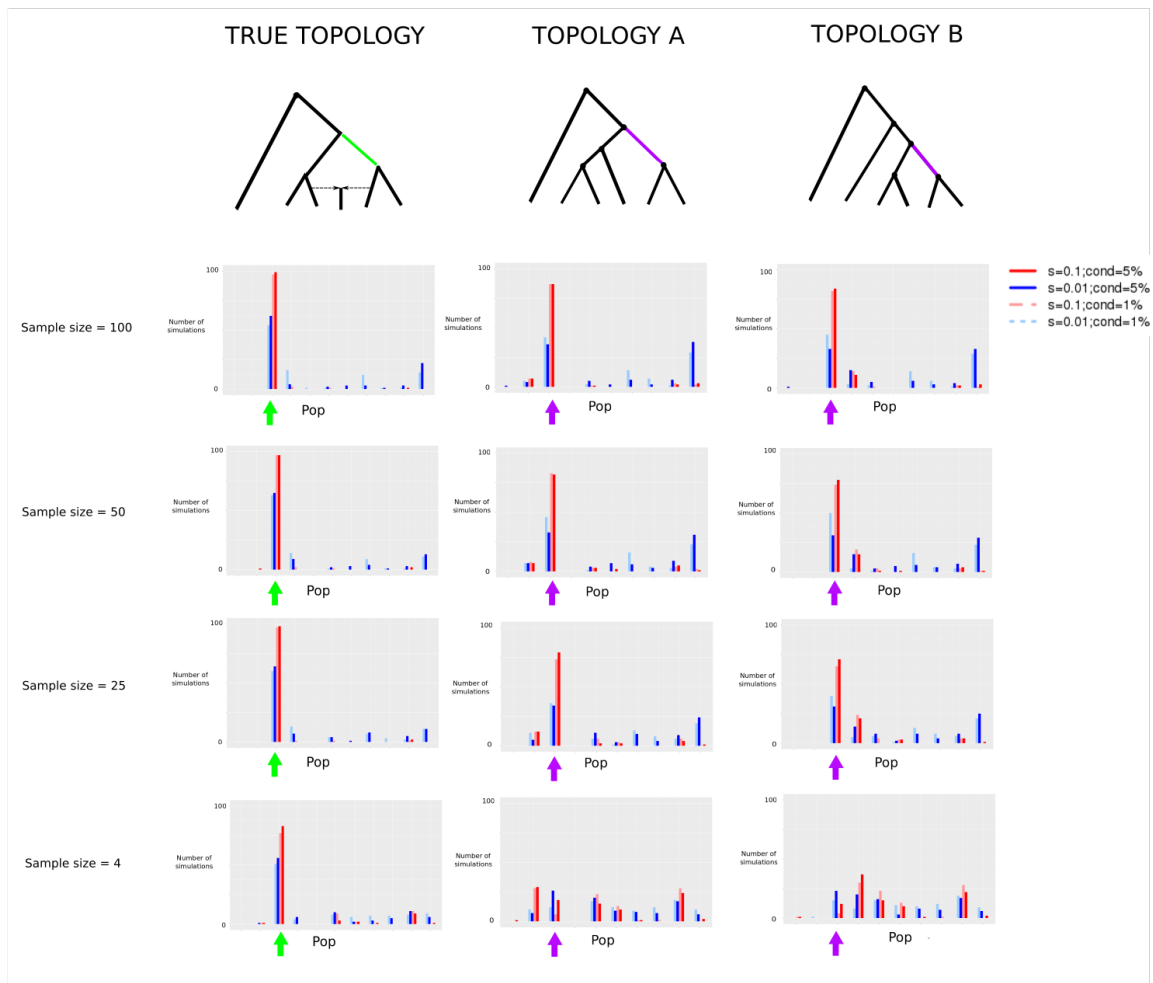

Figure S14: We compared simulations under different selection coefficients,  $s$ , and minimum mutation establishment,  $cond$ , in which we fed *GRoSS* a different 6-population graph topology (A and B) from the one under which we generated the simulations. For each of the 100 simulations under each scenario, we obtained the maximum branch score within 100kb of the selected site, and computed the number of simulations (out of 100) in which the branch of this score corresponded to the true branch in which the selected mutation arose (highlighted in green). The green branch in the true topology is the branch on which the selective event was simulated. The purple branch in each of the wrong topologies is the branch that completely subtends the two populations that are also subtended by the selected branch in the correct graph.

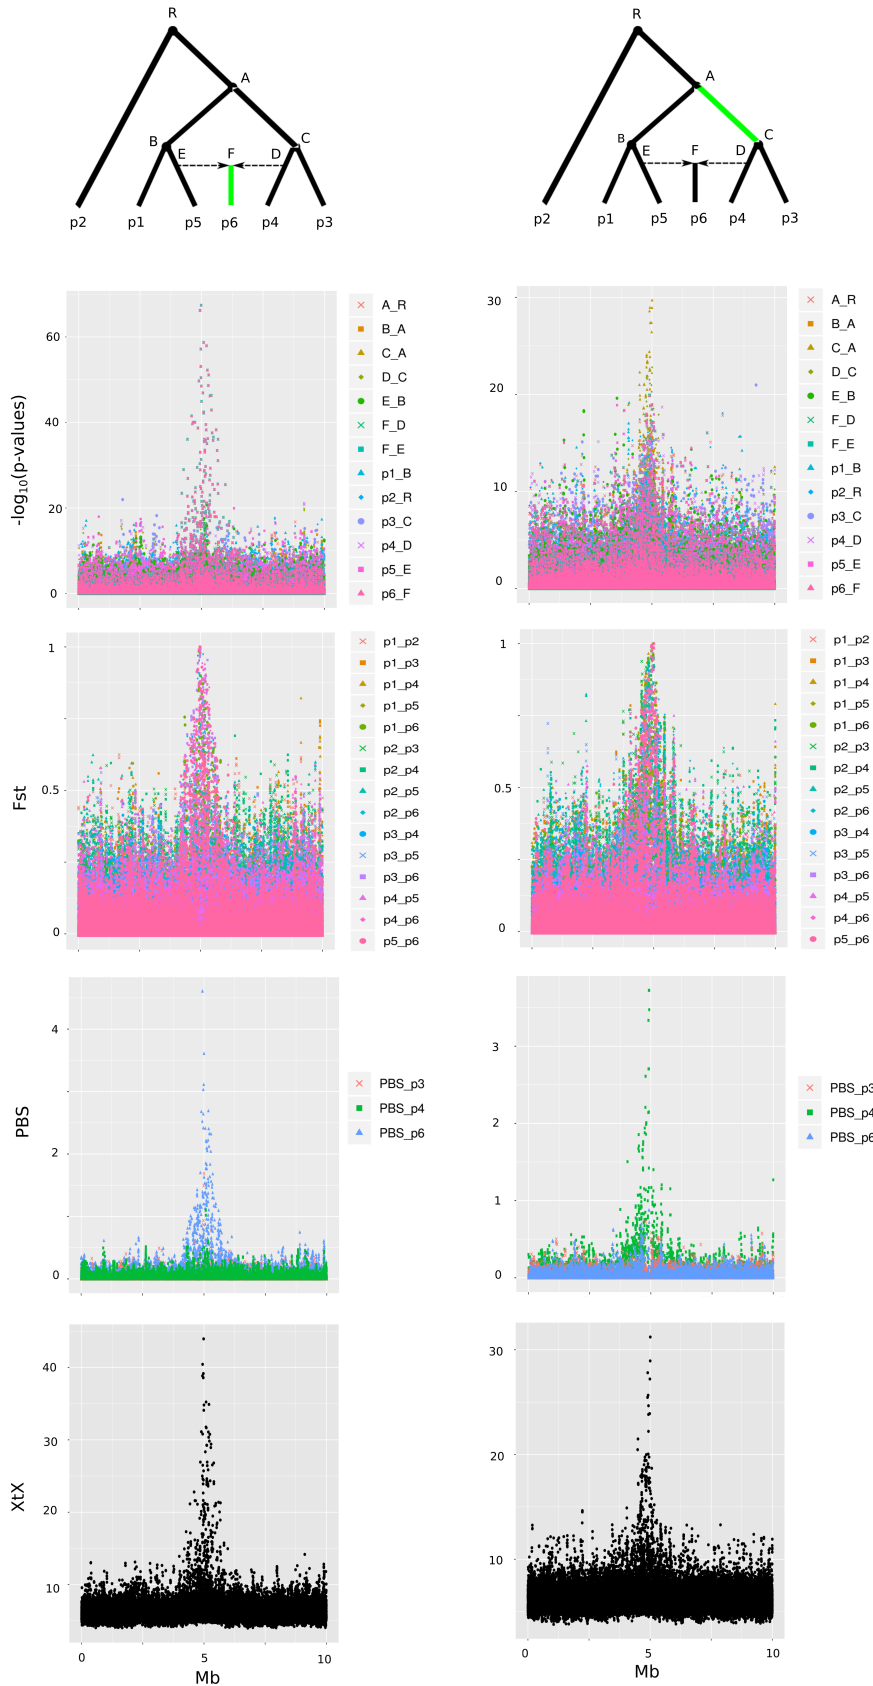

Figure S15: Comparison of population differentiation-based methods used to detect selection. We simulated a strong selective sweep ( $s=0.1$ ) in two different branches of a 6-population graph with admixture. We then ran *GRoSS* for each branch (first row), pairwise  $F_{ST}$  for each population-pair (second row),  $PBS$  (third row) and the  $XtX$  statistic from the *BayPass* program (bottom row). Note that all 15 possible pairwise  $F_{ST}$  tests are depicted, but only 3 out of the possible 60  $PBS$  tests are shown, in the interest of clarity: p3 vs. (p4,p6), p4 vs. (p3,p6) and p6 vs. (p3,p4). These 3 were purposefully chosen such that only one would show a peak at the selected region.

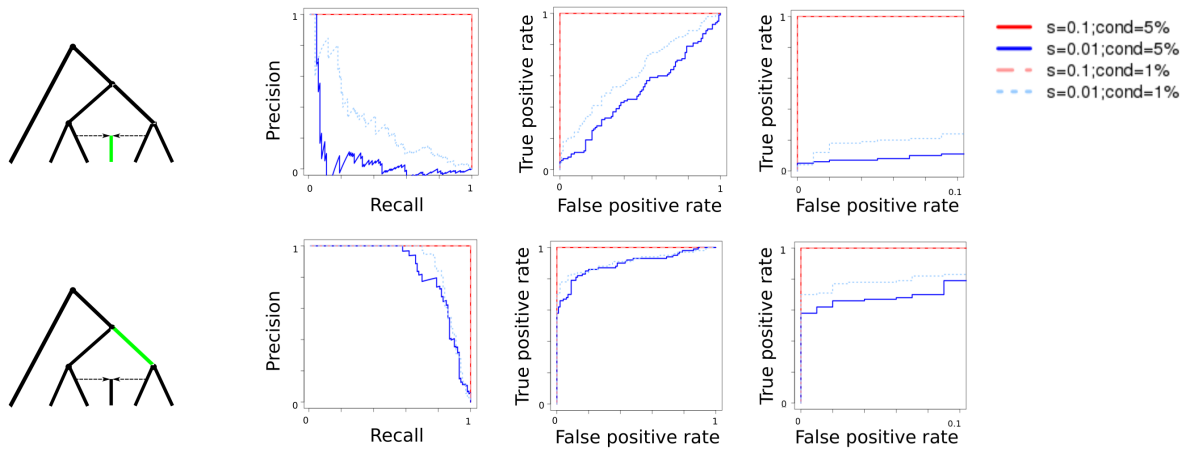

Figure S16: Evaluation of performance of the  $XtX$  statistic from *BayPass* using simulations in *SLiM 2*, with 100 diploid individuals per population panel. We produced precision-recall (left panel) and ROC curves (center and right panels) comparing simulations under selection to simulations under neutrality for a 6-population graph with a 50%/50% admixture event. The right-most ROC curves are a zoomed-in version of the center ROC curves, in which the false positive rate is limited to be equal to or less than 0.1.

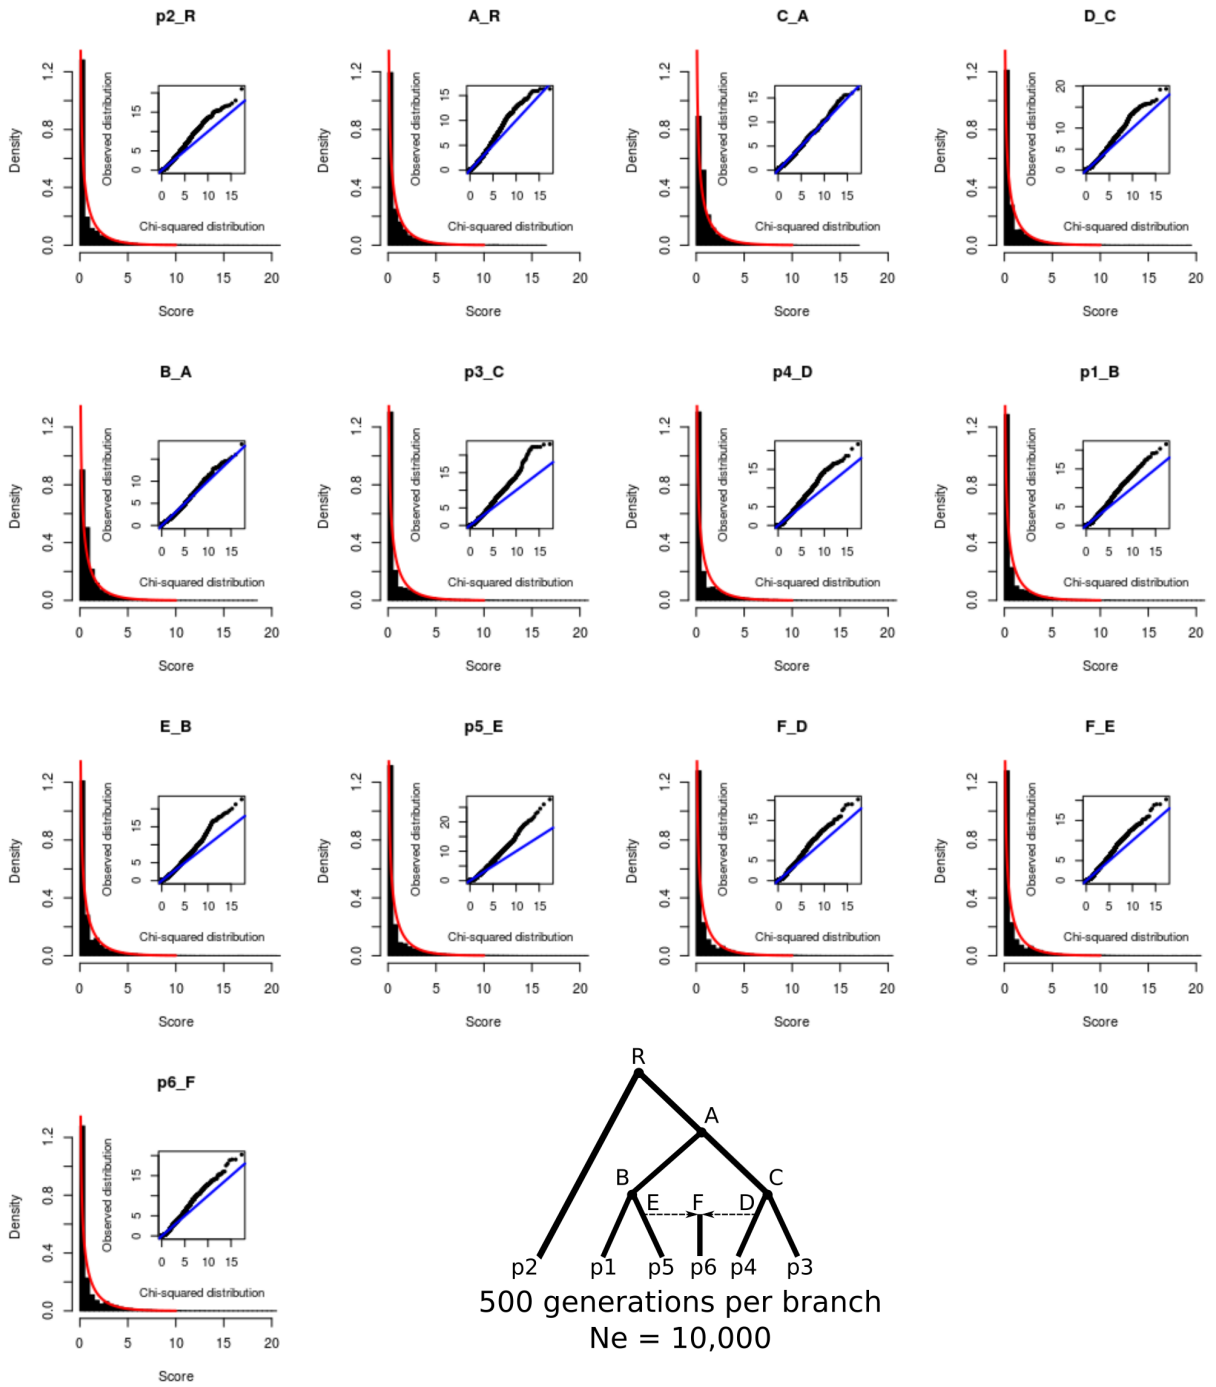

Figure S17: We compared the chi-squared distribution with one degree of freedom (red line) to the actual distribution of  $S_B$  scores (histogram) for each branch of a six-population graph with a 50%/50% admixture event under neutrality, sampling 100 diploid individuals per population panel. The inset is a qq-plot of these two distributions. The blue line is the identity line. The titles above each plot denote the parent and child nodes of each branch.

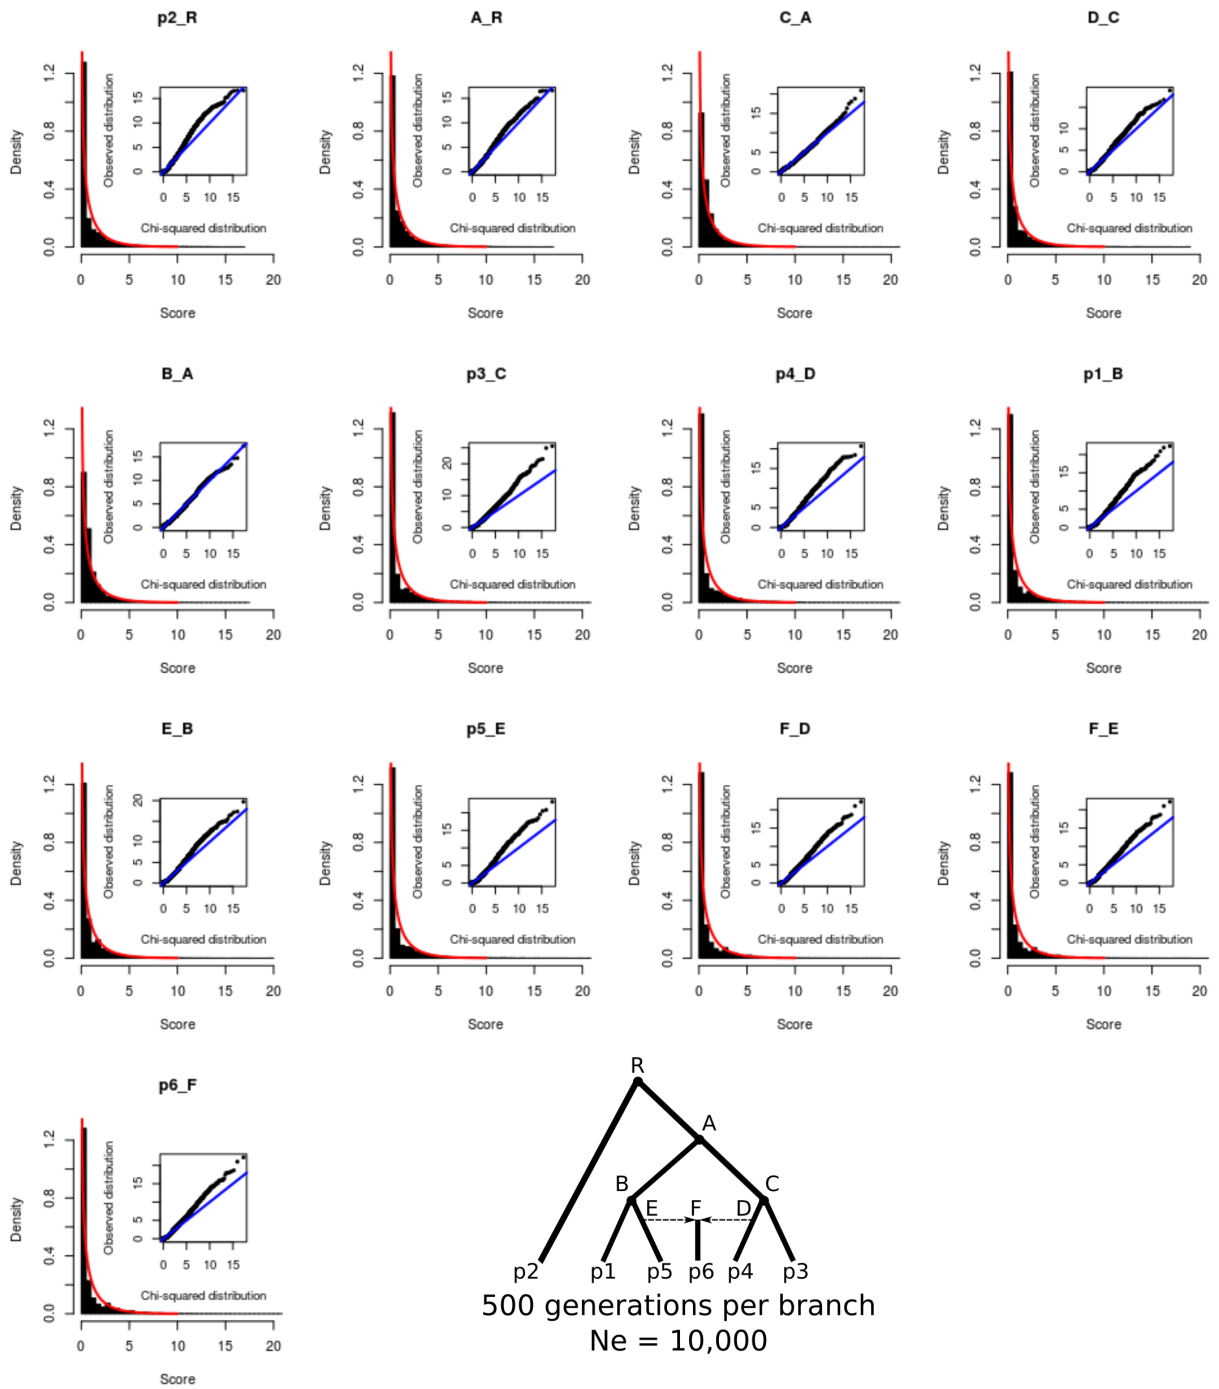

Figure S18: We compared the chi-squared distribution with one degree of freedom (red line) to the actual distribution of  $S_B$  scores (histogram) for each branch of a six-population graph with a 50%/50% admixture event under neutrality, sampling 50 diploid individuals per population panel. The inset is a qq-plot of these two distributions. The blue line is the identity line. The titles above each plot denote the parent and child nodes of each branch.

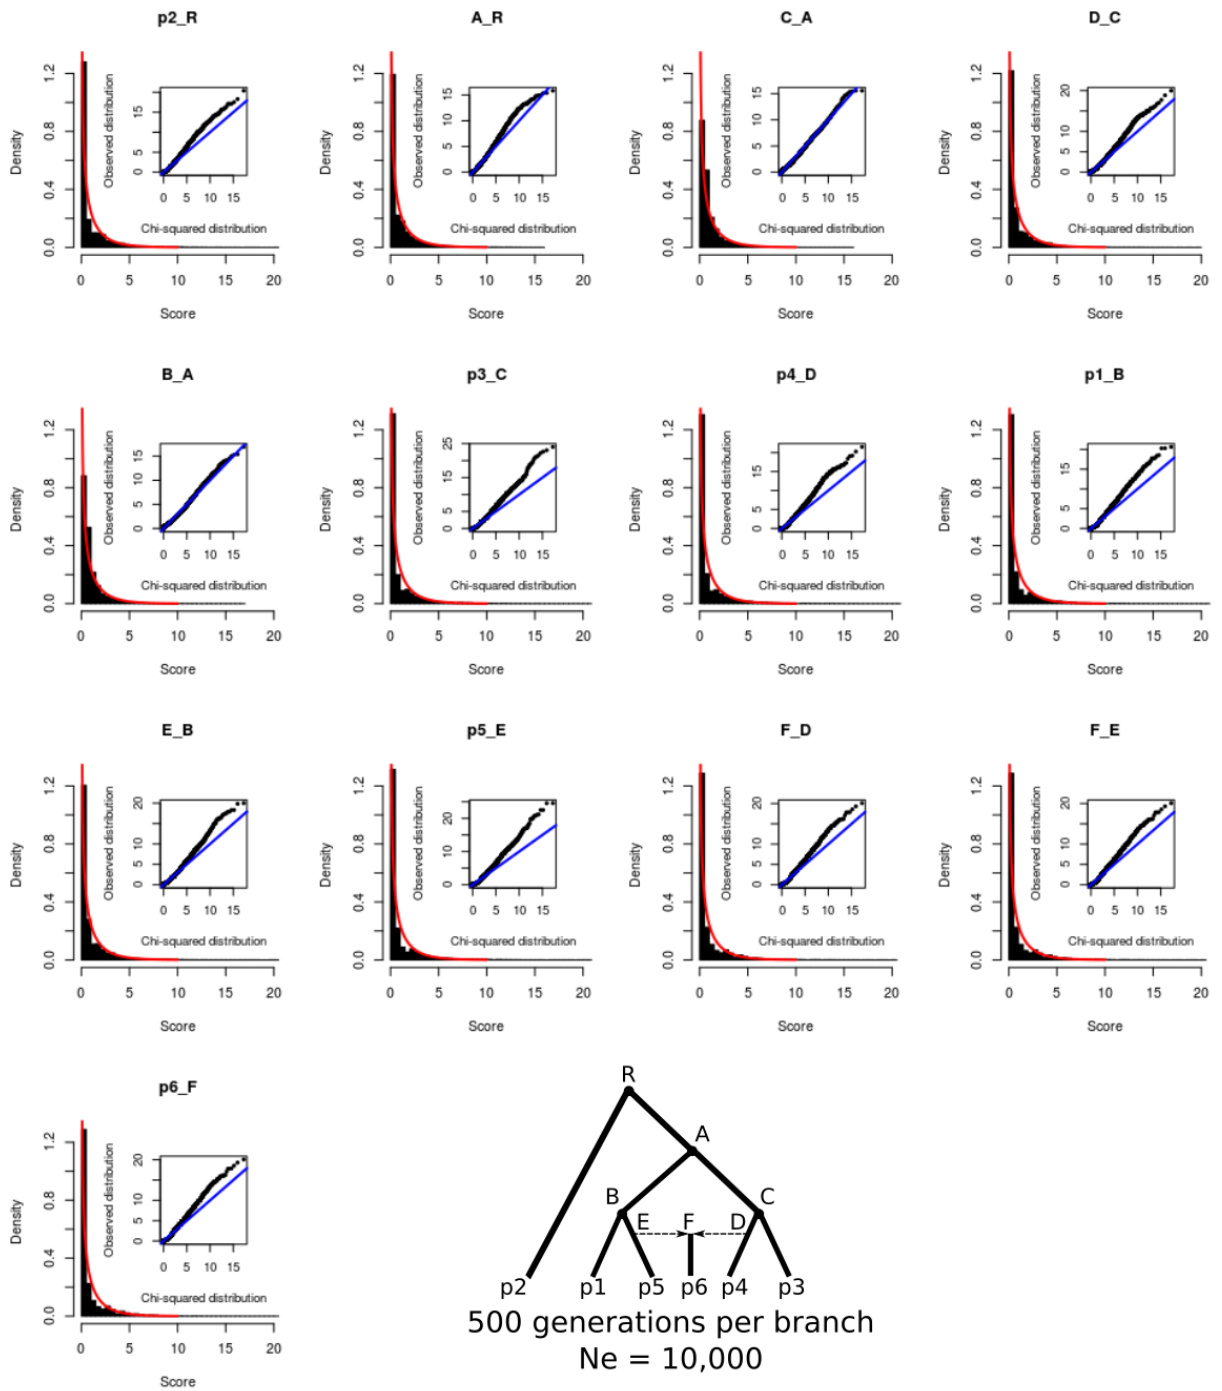

Figure S19: We compared the chi-squared distribution with one degree of freedom (red line) to the actual distribution of  $S_B$  scores (histogram) for each branch of a six-population graph with a 50%/50% admixture event under neutrality, sampling 25 diploid individuals per population panel. The inset is a qq-plot of these two distributions. The blue line is the identity line. The titles above each plot denote the parent and child nodes of each branch.



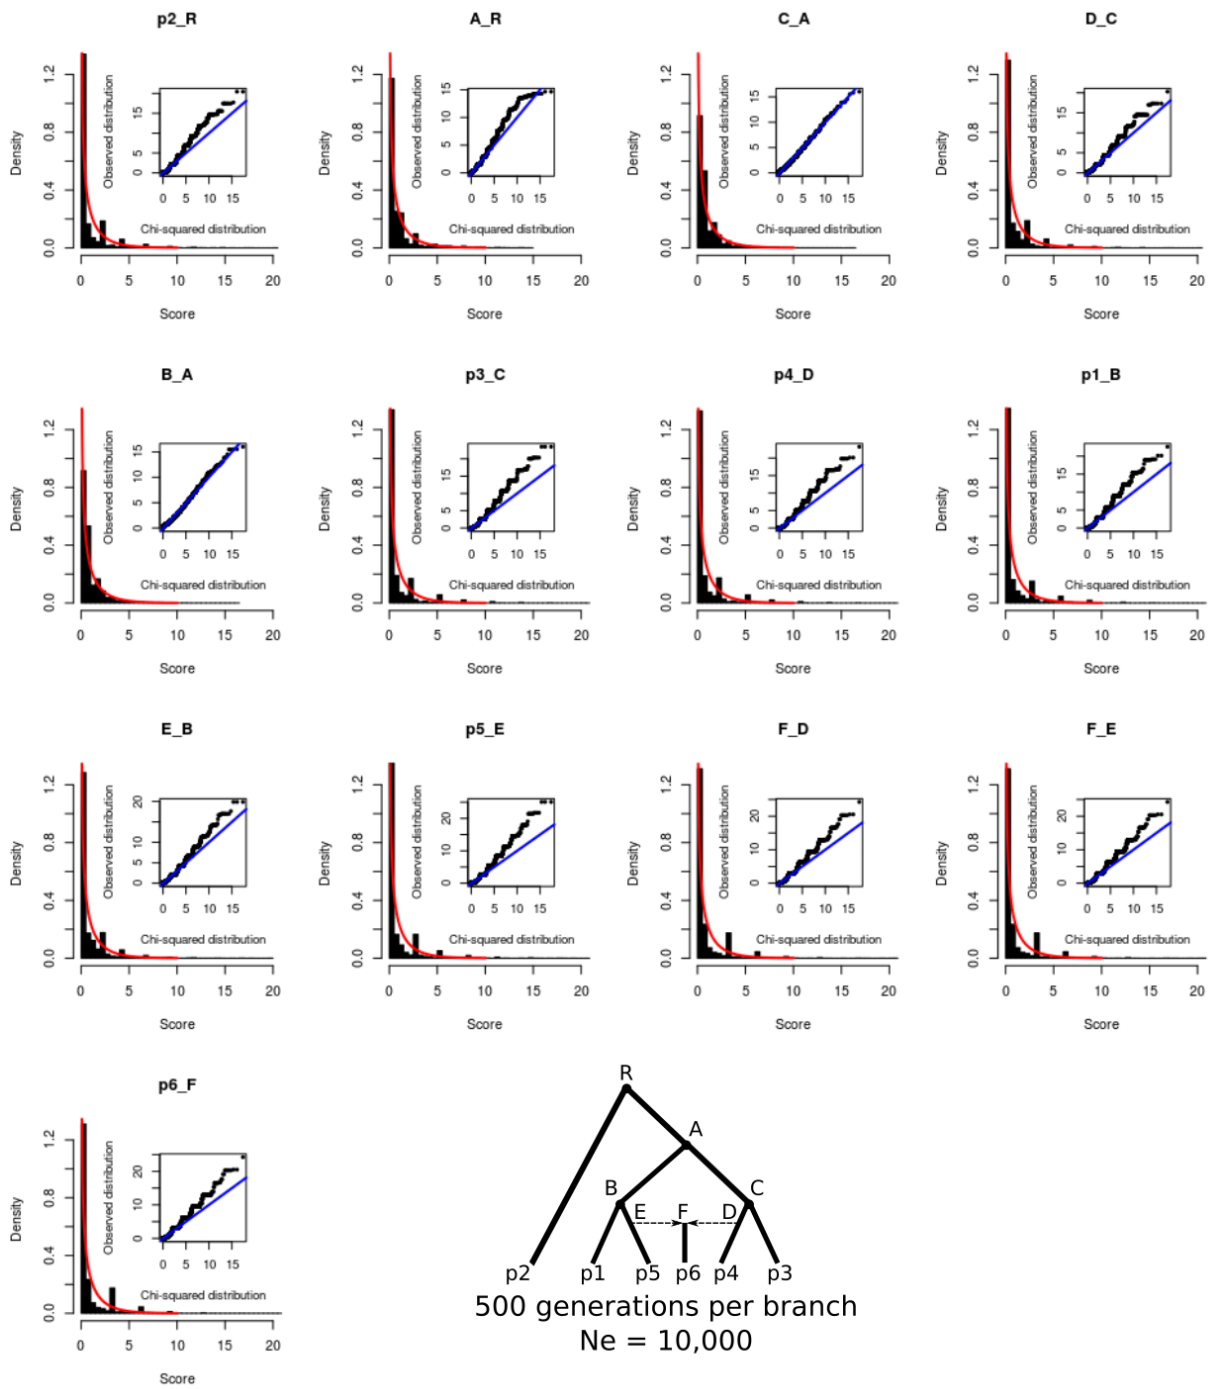

Figure S20: We compared the chi-squared distribution with one degree of freedom (red line) to the actual distribution of  $S_B$  scores (histogram) for each branch of a six-population graph with a 50%/50% admixture event under neutrality, sampling 4 diploid individuals per population panel. The inset is a qq-plot of these two distributions. The blue line is the identity line. The titles above each plot denote the parent and child nodes of each branch.

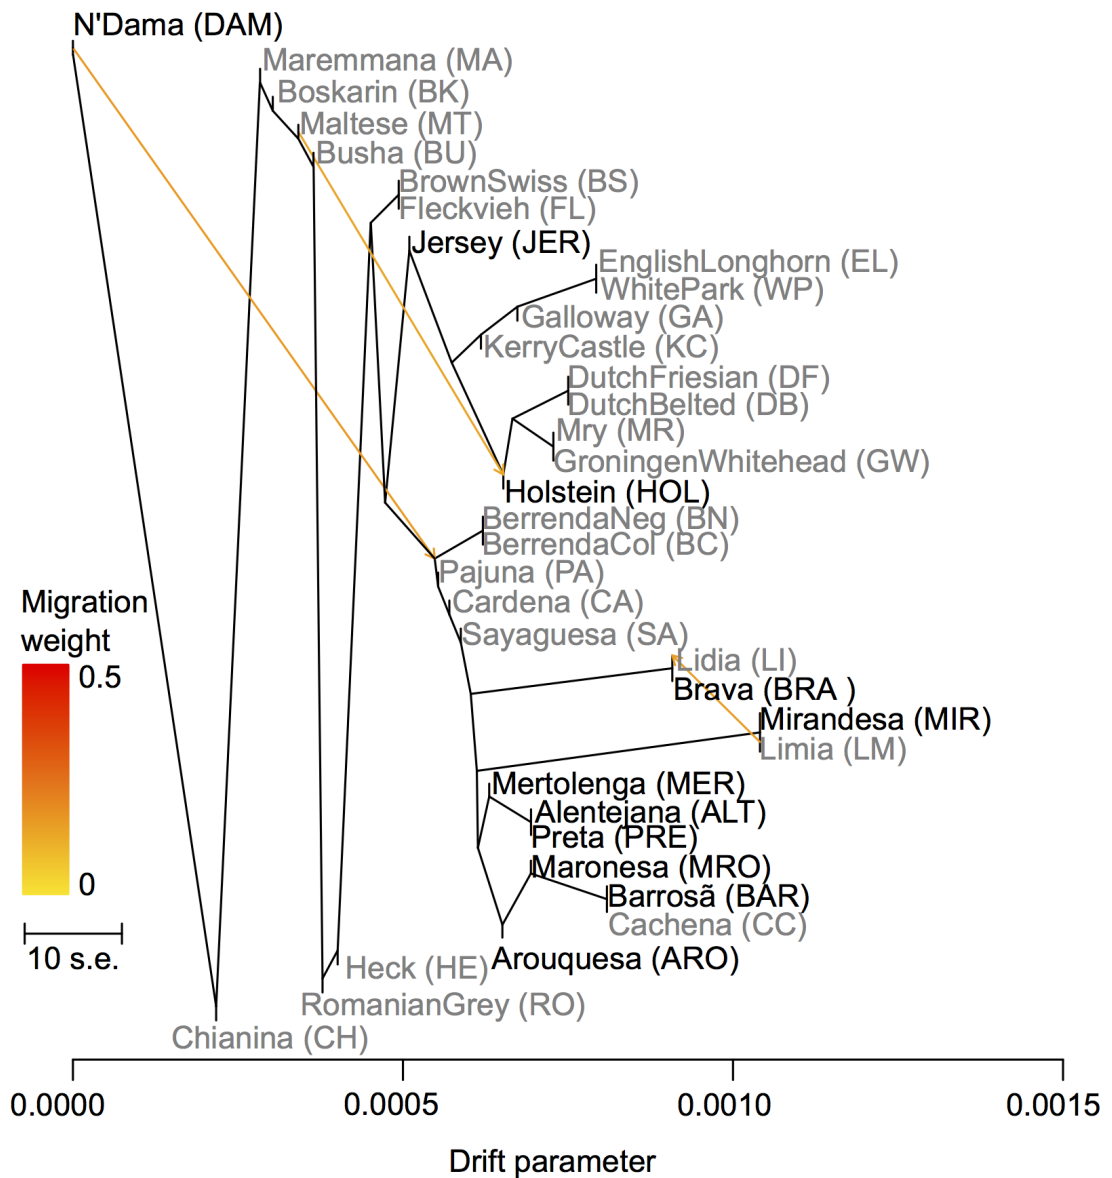

Figure S21: *TreeMix*-fitted maximum likelihood admixture graph with 3 admixture events, depicting the relationships between the taurine cattle breeds analyzed in this study (grey: Illumina BovineHD SNP data; black: whole genome data).

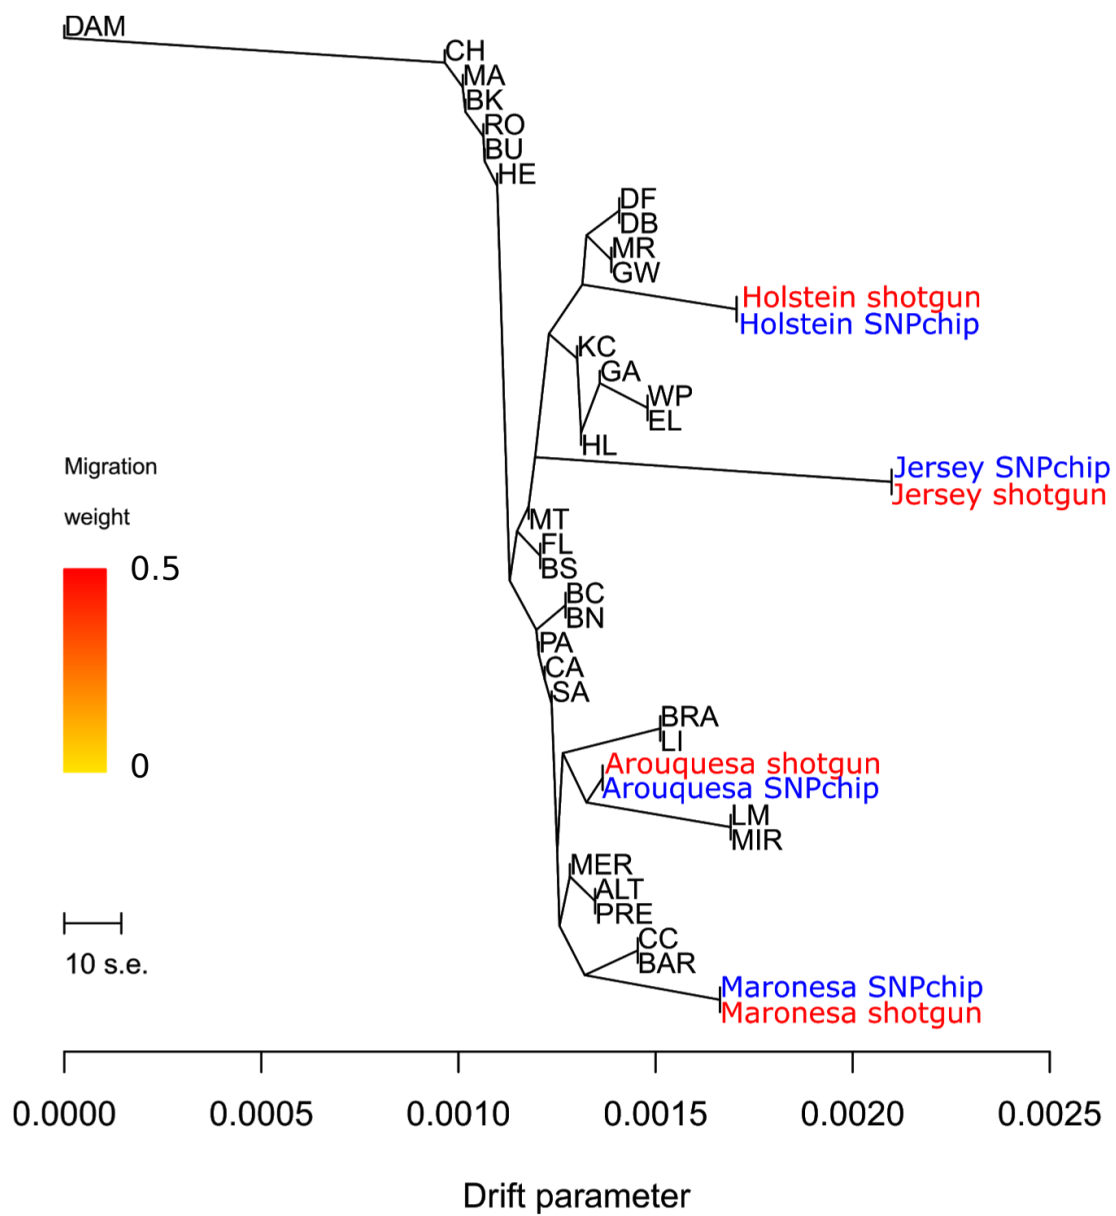

Figure S22: *TreeMix*-fitted maximum likelihood tree, used to test for batch effects between the SNP capture and whole-genome shotgun data, by fitting sequences of the same species that were obtained via both methods.

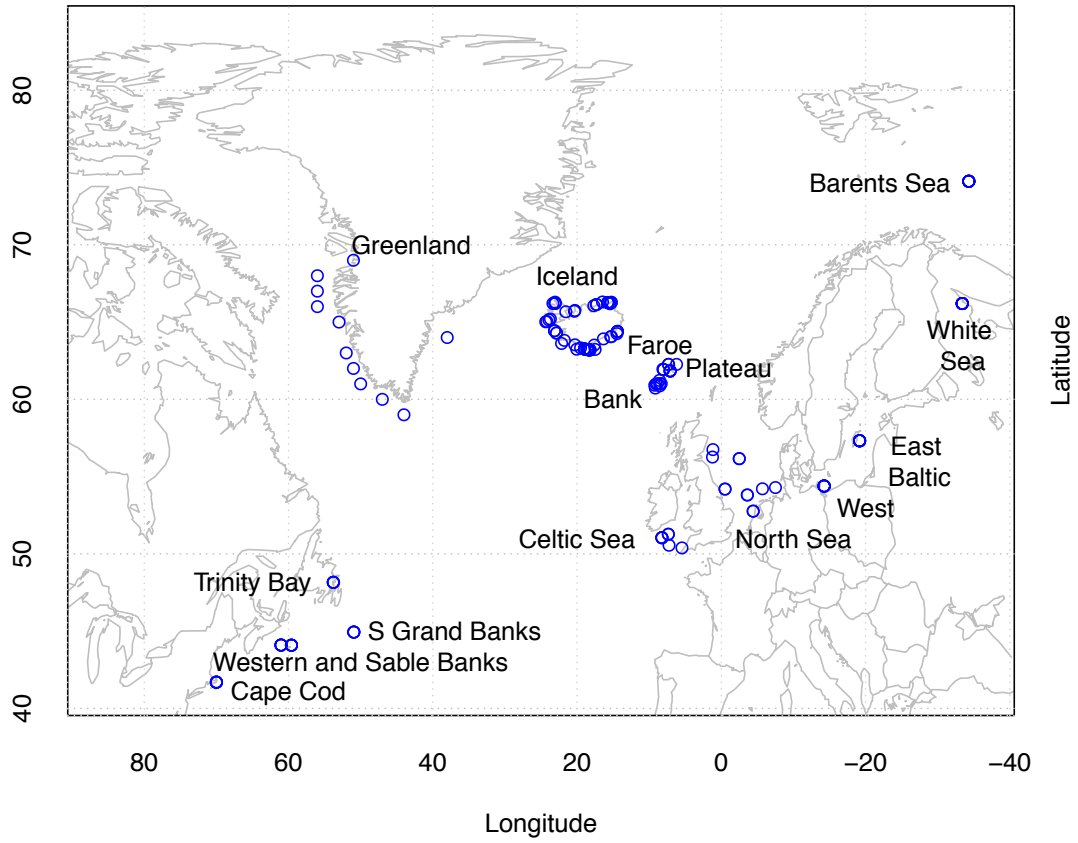

Figure S23: Sample localities of Atlantic cod samples on a map of the North Atlantic.

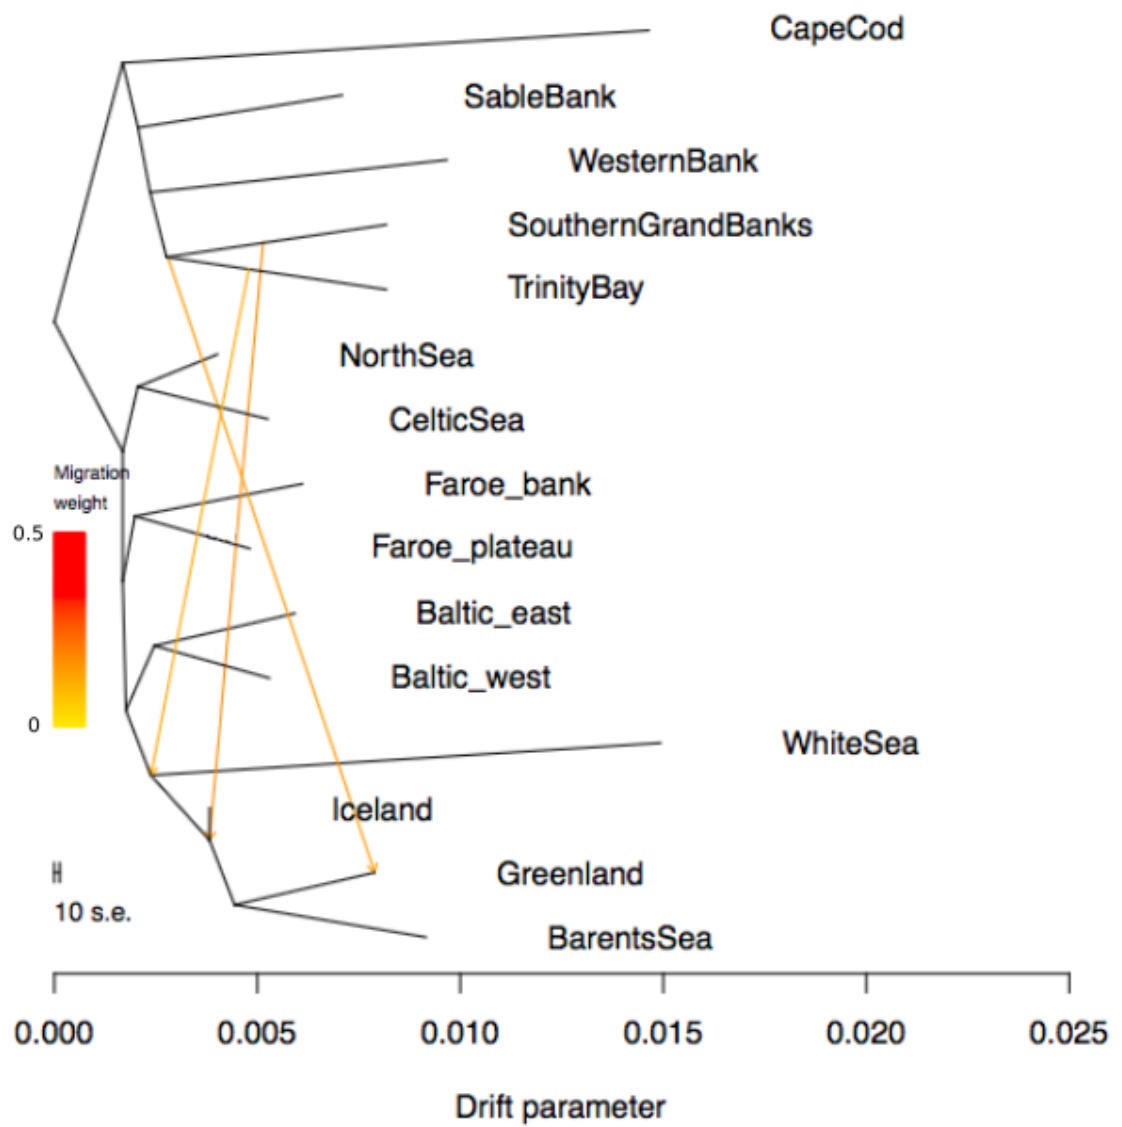

Figure S24: *Treemix*-fitted maximum likelihood admixture graph with 3 admixture events, depicting the relationships between the Atlantic codfish populations.

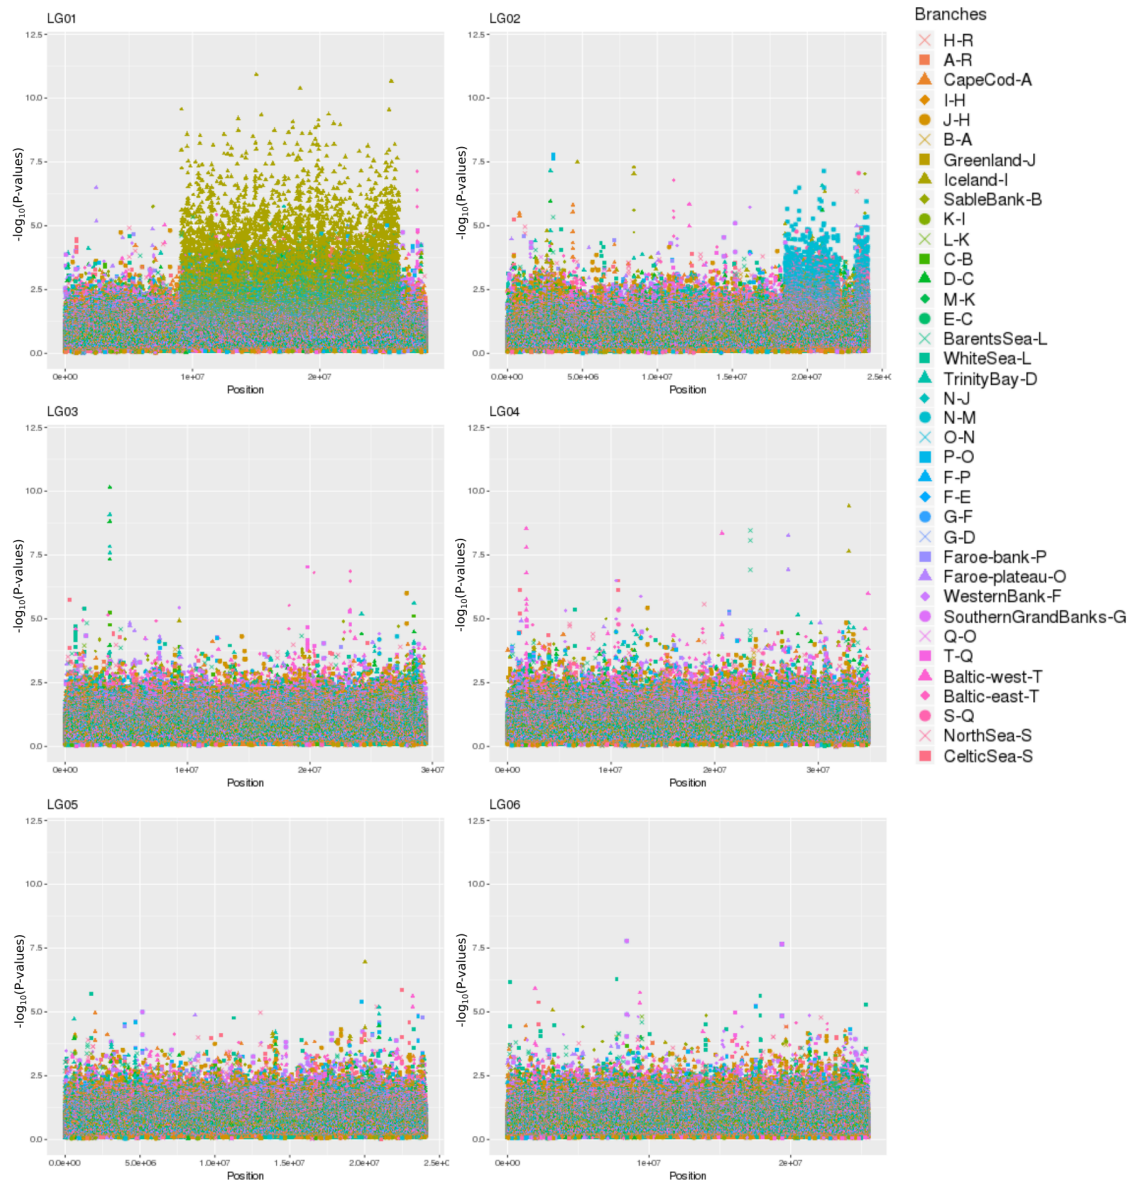

Figure S25:  $S_B$  scores for LG01 - LG06 in the Codfish data.

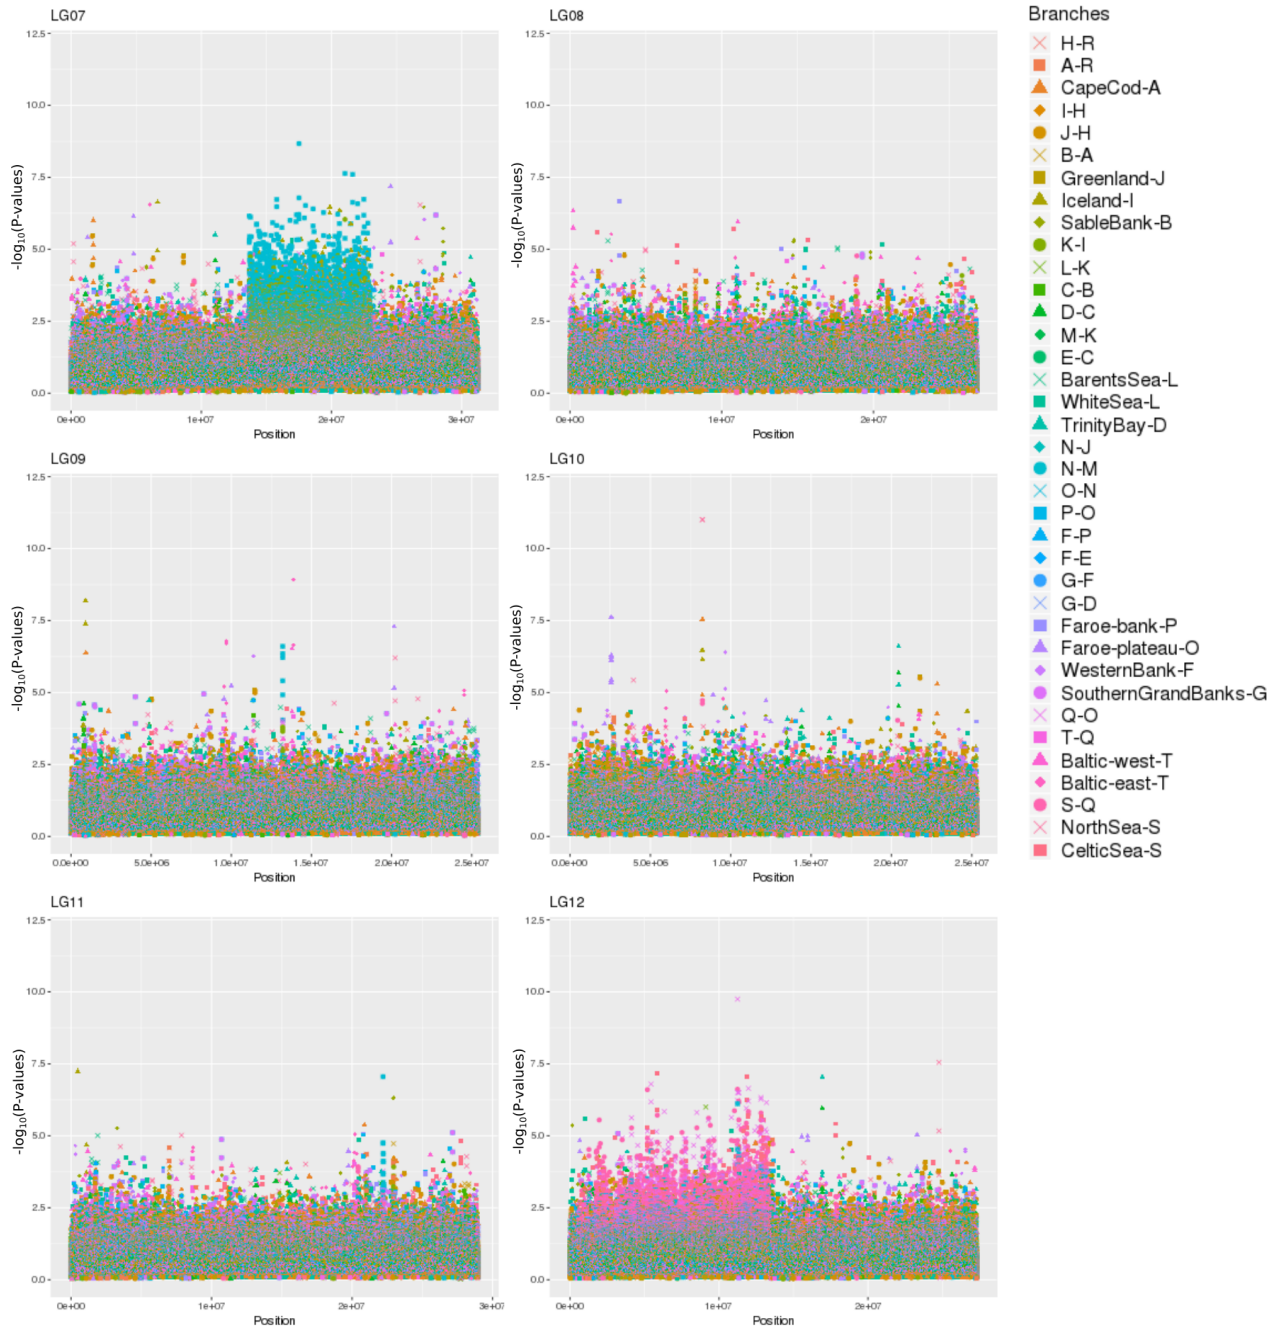

Figure S26:  $S_B$  scores for LG07 - LG12 in the Codfish data.

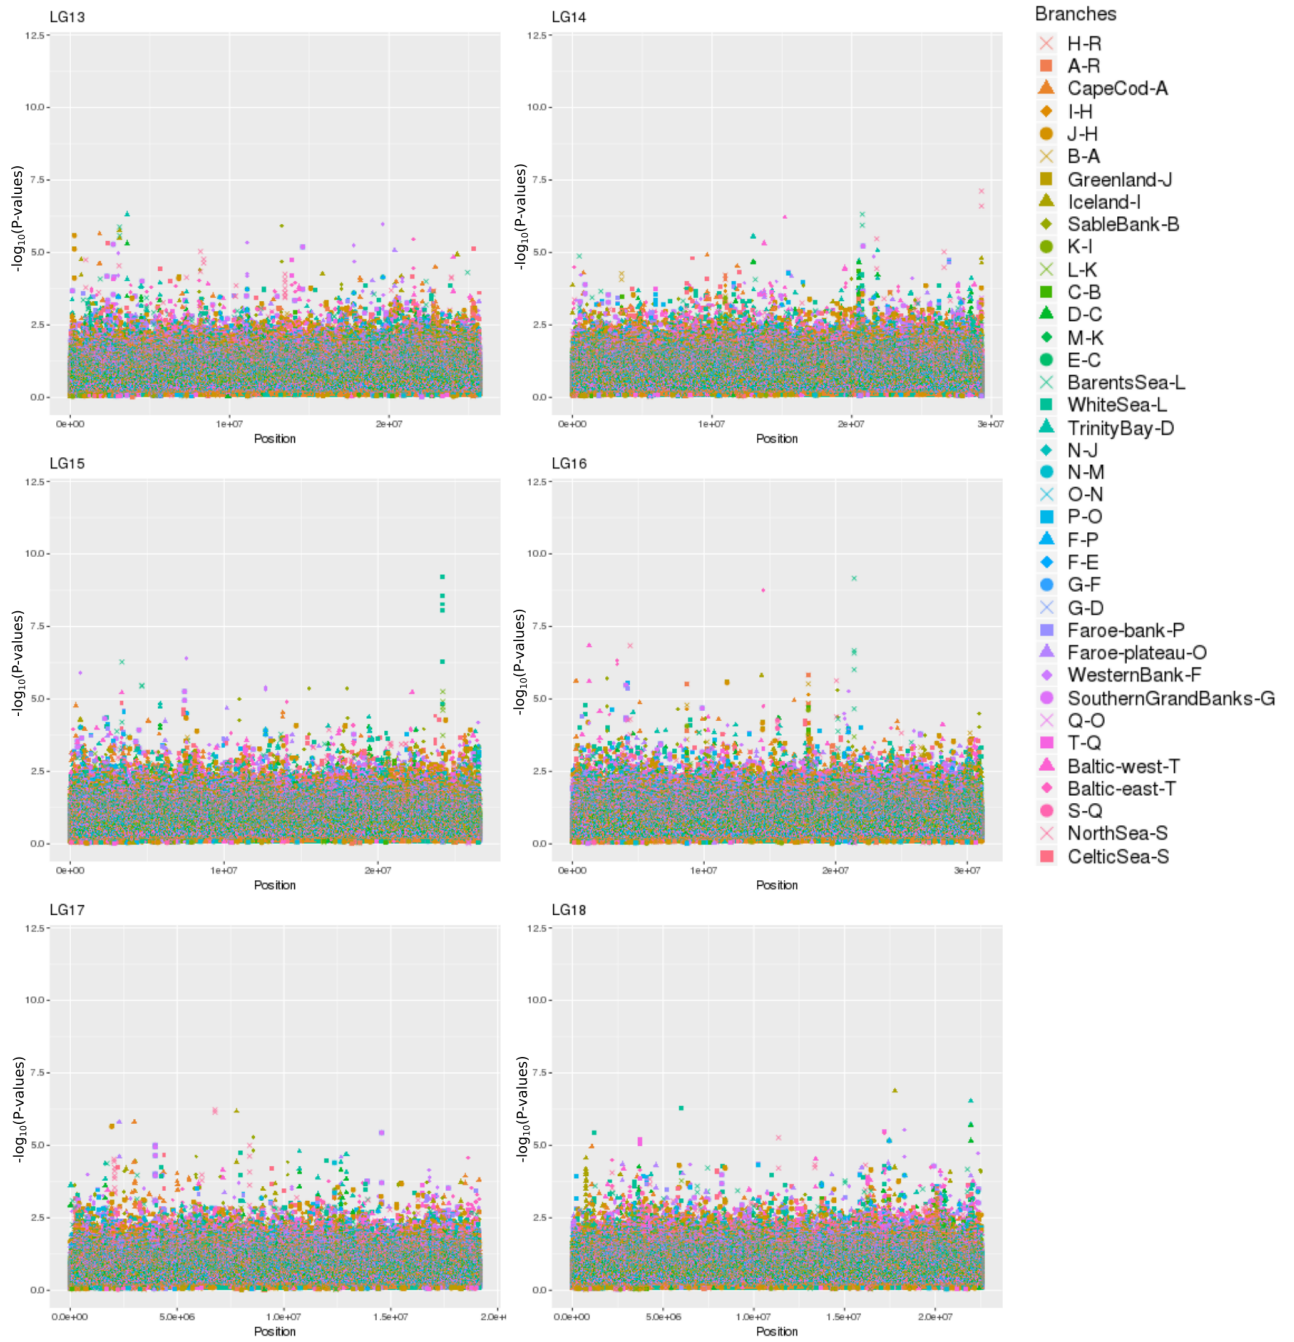

Figure S27:  $S_B$  scores for LG13 - LG18 in the Codfish data.



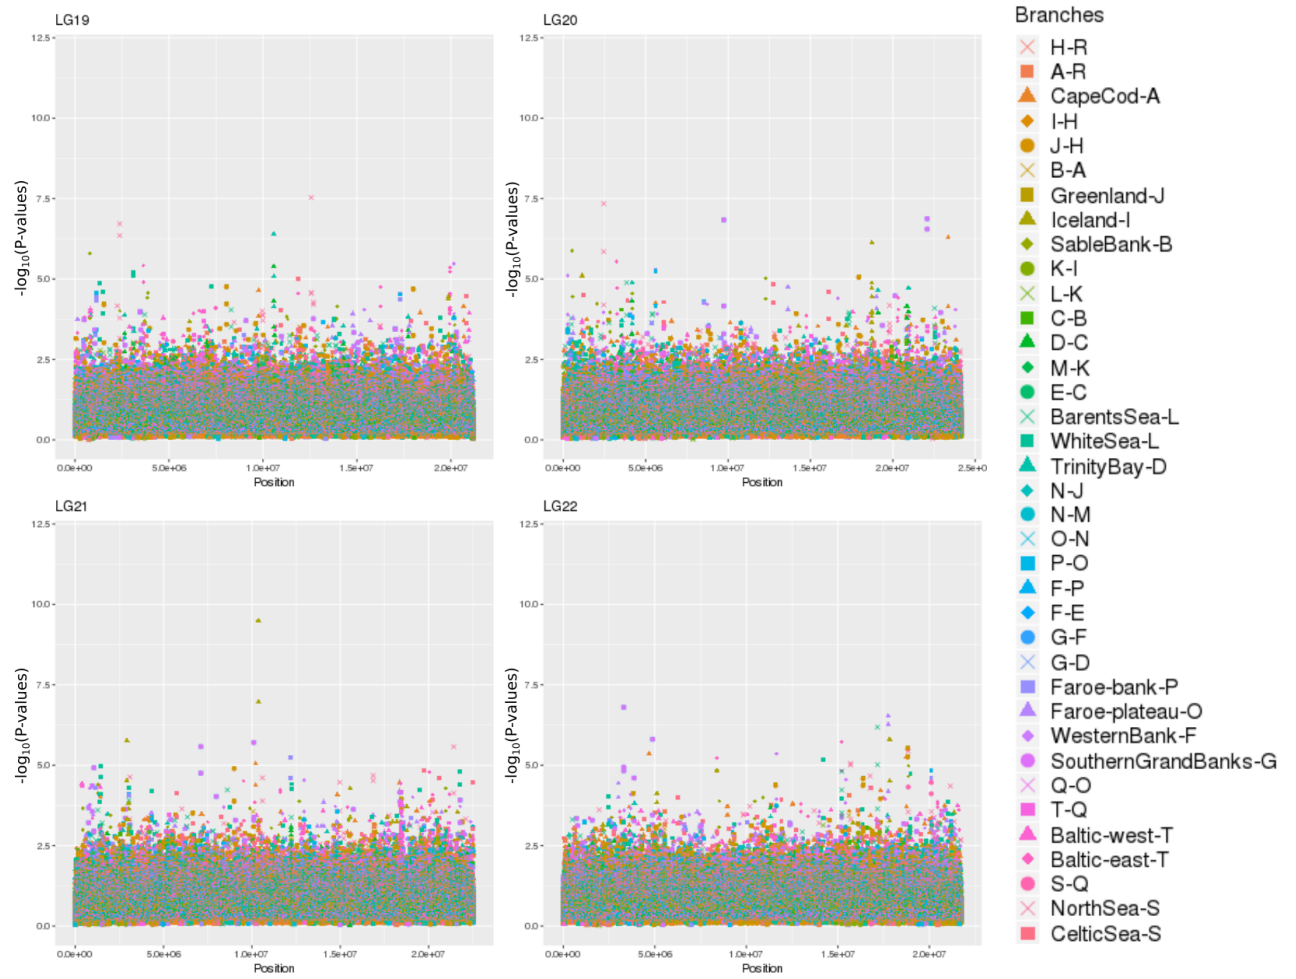

Figure S28:  $S_B$  scores for LG19 - LG22 in the Codfish data.

## Supplemental Tables

Table S1: Proportion of observations under neutrality that are larger than the chi-squared statistic that would correspond to a particular P-value cutoff, computed for different branches of the graph from Figure S17.

| P-value cutoff | 0.05  | 0.01  | 0.001  | 1e-4    | 1e-5    | 1e-6   |
|----------------|-------|-------|--------|---------|---------|--------|
| p2-R           | 0.068 | 0.023 | 0.0046 | 0.00067 | 3.2e-5  | 0      |
| A-R            | 0.059 | 0.019 | 0.004  | 0.00032 | 0       | 0      |
| C-A            | 0.046 | 0.011 | 0.001  | 0.00016 | 0       | 0      |
| D-C            | 0.058 | 0.019 | 0.0034 | 6e-4    | 0       | 0      |
| B-A            | 0.042 | 0.012 | 0.0016 | 9.5e-5  | 0       | 0      |
| p3-C           | 0.066 | 0.024 | 0.0048 | 0.0011  | 0.00045 | 0      |
| p4-D           | 0.069 | 0.023 | 0.0048 | 0.00099 | 6.4e-5  | 0      |
| p1-B           | 0.067 | 0.022 | 0.0053 | 8e-4    | 6.4e-5  | 0      |
| E-B            | 0.06  | 0.018 | 0.0034 | 0.0012  | 0.00013 | 0      |
| p5-E           | 0.068 | 0.024 | 0.006  | 0.0016  | 0.00045 | 9.5e-5 |
| F-D            | 0.067 | 0.021 | 0.0038 | 0.00045 | 3.2e-5  | 0      |
| F-E            | 0.067 | 0.021 | 0.0038 | 0.00045 | 3.2e-5  | 0      |
| p6-F           | 0.067 | 0.021 | 0.0038 | 0.00045 | 3.2e-5  | 0      |

Table S2: Top candidate regions from 1000 Genomes scan.

| BRANCH(ES) | CHR | START     | END       | BEST POSITION(S)      | MAXIMUM SCORE | GENES (+/- 100kb)                                                                                      |
|------------|-----|-----------|-----------|-----------------------|---------------|--------------------------------------------------------------------------------------------------------|
| CDX-t      | 14  | 106143847 | 106389176 | 106243847             | 13.109        | <i>KIAA0125</i>                                                                                        |
| CEU-v      | 2   | 135272951 | 137305495 | 136707982             | 13.033        | <i>MGAT5, TMEM163, ACMSD, CCNT2, MAP3K19, RAB3GAP1, ZRANB3, R3HDM1, UBXLN4, LCT, MCM6, DARS, CXCR4</i> |
| CDX-t      | 14  | 105864438 | 106093254 | 105967202             | 9.396         | <i>BRF1, PACS2, TEX22, MTA1, CRIP2, CRIP1, C14orf80, TMEM121</i>                                       |
| CEU-v      | 15  | 28256859  | 28595956  | 28365618;<br>28356859 | 9.111         | <i>OCA2, HERC2, GOLGA8F</i>                                                                            |
| v-q        | 5   | 33851116  | 34051693  | 33951693              | 9.067         | <i>ADAMTS12, RXFP3, SLC45A2, AMACR, C1QTNF3</i>                                                        |
| CEU-v      | 5   | 33851116  | 34051693  | 33951693              | 8.676         | <i>ADAMTS12, RXFP3, SLC45A2, AMACR, C1QTNF3</i>                                                        |
| v-q        | 15  | 48292165  | 48585926  | 48426484              | 8.673         | <i>SLC24A5, MYEF2, CTXN2, SLC12A1, DUT</i>                                                             |
| TSI-v      | 5   | 33851116  | 34051693  | 33951693              | 8.644         | <i>ADAMTS12, RXFP3, SLC45A2, AMACR, C1QTNF3</i>                                                        |
| TSI-v      | 15  | 48292165  | 48585926  | 48426484              | 8.356         | <i>SLC24A5, MYEF2, CTXN2, SLC12A1, DUT</i>                                                             |
| CEU-v      | 15  | 48292165  | 48585926  | 48426484              | 8.214         | <i>SLC24A5, MYEF2, CTXN2, SLC12A1, DUT</i>                                                             |
| v-q        | 17  | 4300392   | 4500392   | 4400392               | 7.912         | <i>UBE2G1, SPNS3, SPNS2, MYBBP1A, GGT6, SMTNL2, ALOX15, PELP1</i>                                      |
| CEU-v      | 4   | 38698648  | 38898648  | 38798648              | 7.815         | <i>KLF3, TLR10, TLR1, TLR6, FAM114A1, TMEM156</i>                                                      |
| TSI-v      | 17  | 4300392   | 4500392   | 4400392               | 7.734         | <i>UBE2G1, SPNS3, SPNS2, MYBBP1A, GGT6, SMTNL2, ALOX15, PELP1</i>                                      |
| CEU-v      | 9   | 16692200  | 16902118  | 16800341              | 7.598         | <i>BNC2</i>                                                                                            |
| CEU-v      | 17  | 4300392   | 4500392   | 4400392               | 7.389         | <i>UBE2G1, SPNS3, SPNS2, MYBBP1A, GGT6, SMTNL2, ALOX15, PELP1</i>                                      |
| TSI-v      | 17  | 18823818  | 19023818  | 18923818              | 7.382         | <i>PRPSAP2, SLC5A10, FAM83G, GRAP, GRAPL, EPN2</i>                                                     |
| TSI-v      | 17  | 19074874  | 19399144  | 19239432              | 7.35          | <i>GRAPL, EPN2, B9D1, MAPK7, MFAP4, RNF112, SLC47A1</i>                                                |
| v-q        | 17  | 18823818  | 19023818  | 18923818              | 7.326         | <i>PRPSAP2, SLC5A10, FAM83G, GRAP, GRAPL, EPN2</i>                                                     |
| v-q        | 17  | 19053175  | 19399144  | 19174874              | 7.323         | <i>GRAPL, EPN2, B9D1, MAPK7, MFAP4, RNF112, SLC47A1</i>                                                |
| TSI-v      | 20  | 31031309  | 31252094  | 31152094              | 7.113         | <i>ASXL1, C20orf112, COMMD7, DNMT3B</i>                                                                |
| CDX-t      | 4   | 17713761  | 17913762  | 17813761;<br>17813762 | 7.027         | <i>MED28, FAM184B, DCAF16, NCAPG, LCOLL</i>                                                            |

Table S3: Top candidate regions from Human Origins scan.

| BRANCH(ES)           | CHR | START     | END       | BEST POSITION(S)                                    | MAXIMUM SCORE | GENES (+/- 100kb)                                                                                                                                                                                                                                                 |
|----------------------|-----|-----------|-----------|-----------------------------------------------------|---------------|-------------------------------------------------------------------------------------------------------------------------------------------------------------------------------------------------------------------------------------------------------------------|
| EastAsian-v          | 1   | 234527890 | 234735790 | 234635790                                           | 8.712         | <i>SLC35F3, COA6, TARBP1, IRF2BP2</i>                                                                                                                                                                                                                             |
| EastAsian-v          | 11  | 119993920 | 120272688 | 120164246;<br>120164903;<br>120164954;<br>120165302 | 8.625         | <i>TRIM29, OAF, POU2F3, TMEM136, ARHGEF12</i>                                                                                                                                                                                                                     |
| EastAsian-v          | 17  | 72925996  | 73163811  | 73063811                                            | 8.238         | <i>SUMO2, NUP85, GGA3, TMEM104, GRIN2C, FDXR, MRPS7, FADS6, USH1G, OTOP2, MIF4GD, OTOP3, HID1, CDR2L, ICT1, KCTD2, ATP5H, SLC16A5, ARMC7, NT5C, HN1 ANKRD11, SPG7, RPL13, CPNE7, DPEP1, CHMP1A, SPATA33, CDK10, SPATA2L, VPS9D1, ZNF276, FANCA, SPIRE2, TCF25</i> |
| EastAsian-v          | 16  | 89576635  | 89847265  | 89694907;<br>89695266                               | 7.905         |                                                                                                                                                                                                                                                                   |
| w-y; w-x; European-w | 4   | 38645482  | 38865720  | 38745482                                            | 7.869         | <i>KLF3, TLR10, TLR1, TLR6, FAM114A1</i>                                                                                                                                                                                                                          |
| w-y; w-x; European-w | 2   | 136879530 | 137129668 | 136981210;<br>136979530                             | 7.868         | <i>CXCR4</i>                                                                                                                                                                                                                                                      |
| w-y; w-x; European-w | 5   | 33851693  | 34051693  | 33951693                                            | 7.8           | <i>ADAMTS12, RXFP3, SLC45A2, AMACR, C1QTNF3</i>                                                                                                                                                                                                                   |
| NativeAmerican-x     | 3   | 119728374 | 120083940 | 119881691;<br>119887721                             | 7.658         | <i>GSK3B, GPR156, LRRC58, FSTL1</i>                                                                                                                                                                                                                               |
| NativeAmerican-x     | 16  | 11260583  | 11572138  | 11360583                                            | 7.658         | <i>CLEC16A, RMI2, SOCS1, TNP2, PRM3, PRM2, PRM1, LITAF</i>                                                                                                                                                                                                        |
| EastAsian-v          | 13  | 74026534  | 74264642  | 74136907;<br>74136940;<br>74137131                  | 7.616         | <i>KLF12</i>                                                                                                                                                                                                                                                      |
| EastAsian-v          | 22  | 42776791  | 42978831  | 42876791;<br>42878831                               | 7.605         | <i>TCF20, NFAM1, RRP7A, SERHL2, POLDIP3, CYB5R3, ATP5L2</i>                                                                                                                                                                                                       |
| x-v                  | 3   | 119728374 | 120083940 | 119881691;<br>119887721;<br>119983940               | 7.437         | <i>GSK3B, GPR156, LRRC58, FSTL1</i>                                                                                                                                                                                                                               |
| x-v                  | 16  | 11260583  | 11513302  | 11360583                                            | 7.437         | <i>CLEC16A, RMI2, SOCS1, TNP2, PRM3, PRM2, PRM1</i>                                                                                                                                                                                                               |
| NativeAmerican-x     | 12  | 30976944  | 31176944  | 31076944                                            | 7.358         | <i>CAPRIN2, TSPAN11, DDX11</i>                                                                                                                                                                                                                                    |
| w-y; w-x; European-w | 15  | 48326484  | 48526484  | 48426484                                            | 7.332         | <i>SLC24A5, MYEF2, CTXN2, SLC12A1, DUT</i>                                                                                                                                                                                                                        |
| y-q                  | 15  | 48326484  | 48526484  | 48426484                                            | 7.323         | <i>SLC24A5, MYEF2, CTXN2, SLC12A1, DUT</i>                                                                                                                                                                                                                        |
| NativeAmerican-x     | 14  | 21538319  | 21747765  | 21638319;<br>21647765                               | 7.306         | <i>METTL17, SLC39A2, NDRG2, TPPP2, RNASE13, RNASE7, RNASE8, ARHGEF40, ZNF219, TMEM253, OR5AU1, HNRNPC, RPGRIP1, SUPT16H</i>                                                                                                                                       |
| NativeAmerican-x     | 14  | 47633244  | 47870258  | 47733244                                            | 7.263         | <i>MDGA2</i>                                                                                                                                                                                                                                                      |
| x-v                  | 14  | 47633244  | 47870258  | 47733244                                            | 7.257         | <i>MDGA2</i>                                                                                                                                                                                                                                                      |
| EastAsian-v          | 2   | 48123015  | 48337869  | 48237869                                            | 7.251         | <i>MSH6, FBXO11</i>                                                                                                                                                                                                                                               |
| EastAsian-v          | 3   | 138824073 | 139070998 | 138969652;<br>138970998                             | 7.232         | <i>PRR23A, MRPS22, PRR23B, PRR23C, COPB2</i>                                                                                                                                                                                                                      |
| x-v                  | 12  | 30976944  | 31176944  | 31076944                                            | 7.145         | <i>CAPRIN2, TSPAN11, DDX11</i>                                                                                                                                                                                                                                    |
| x-v                  | 14  | 21538319  | 21747765  | 21638319;<br>21647765                               | 7.122         | <i>METTL17, SLC39A2, NDRG2, TPPP2, RNASE13, RNASE7, RNASE8, ARHGEF40, ZNF219, TMEM253, OR5AU1, HNRNPC, RPGRIP1, SUPT16H</i>                                                                                                                                       |
| EastAsian-v          | 16  | 11265643  | 11466258  | 11365643                                            | 7.106         | <i>CLEC16A, RMI2, SOCS1, TNP2, PRM3, PRM2, PRM1</i>                                                                                                                                                                                                               |
| EastAsian-v          | 16  | 48275777  | 48482522  | 48375777;<br>48382522                               | 7.045         | <i>ABCC12, ABCC11, LONP2, SIAH1, N4BP1</i>                                                                                                                                                                                                                        |
| NativeAmerican-x     | 14  | 77516061  | 77719186  | 77619186                                            | 7.034         | <i>IRF2BPL, CIPC, TMEM63C, ZDHHC22, NGB, POMT2, GSTZ1, TMED8</i>                                                                                                                                                                                                  |

Table S4: Country, sample sizes and data type for panels of cattle breeds analyzed in this study.

| Abbreviation | Breed name            | Country or region | Sample size | Data type | Reference              |
|--------------|-----------------------|-------------------|-------------|-----------|------------------------|
| ALT          | Alentejana            | Portugal          | 6           | shotgun   | da Fonseca et al. 2019 |
| ARO          | Arouquesa             | Portugal          | 6           | shotgun   | da Fonseca et al. 2019 |
| BAR          | Barrosã               | Portugal          | 6           | shotgun   | da Fonseca et al. 2019 |
| BC           | Berrenda en colorado  | Spain             | 3           | 777K chip | Upadhyay et al. 2017   |
| BK           | Boskarin              | Hungary           | 4           | 777K chip | Shaheen et al. 2015    |
| BN           | Berrenda en negro     | Spain             | 3           | 777K chip | Upadhyay et al. 2017   |
| BRA          | Brava de Lide         | Portugal          | 6           | shotgun   | da Fonseca et al. 2019 |
| BS           | Brown Swiss           | Switzerland       | 4           | 777K chip | Upadhyay et al. 2017   |
| BU           | Busha                 | Balkan region     | 6           | 777K chip | Upadhyay et al. 2017   |
| CA           | Cachena               | Portugal          | 3           | 777K chip | Upadhyay et al. 2017   |
| CCIBR        | Cardena               | Spain             | 5           | 777K chip | Upadhyay et al. 2017   |
| CH           | Chianina              | Italy             | 3           | 777K chip | Upadhyay et al. 2017   |
| DAM          | N'Dama                | Africa            | 10          | shotgun   | Kim et al. 2017        |
| DB           | Dutch Belted          | The Netherlands   | 2           | 777K chip | Upadhyay et al. 2017   |
| DF           | Dutch Friesian        | The Netherlands   | 4           | 777K chip | Upadhyay et al. 2017   |
| EL           | English Longhorn      | England           | 4           | 777K chip | Upadhyay et al. 2017   |
| FL           | Fleckvieh             | Switzerland       | 4           | 777K chip | Upadhyay et al. 2017   |
| GA           | Galloway              | Scotland          | 5           | 777K chip | Upadhyay et al. 2017   |
| GW           | Groningen Whiteheaded | The Netherlands   | 5           | 777K chip | Upadhyay et al. 2017   |
| HE           | Heck                  | Germany           | 5           | 777K chip | Upadhyay et al. 2017   |
| HOL          | Holstein              | The Netherlands   | 10          | shotgun   | Kim et al. 2017        |
| JER          | Jersey                | Jersey Island     | 9           | shotgun   | Kim et al. 2017        |
| KC           | Kerry Cattle          | Ireland           | 4           | 777K chip | Upadhyay et al. 2017   |
| LI           | Lidia                 | Spain             | 3           | 777K chip | Upadhyay et al. 2017   |
| LM           | Limia                 | Spain             | 4           | 777K chip | Upadhyay et al. 2017   |
| MA           | Maremmana             | Italy             | 5           | 777K chip | Upadhyay et al. 2017   |
| MER          | Mertolenga            | Portugal          | 6           | shotgun   | da Fonseca et al. 2019 |
| MIR          | Mirandesa             | Portugal          | 6           | shotgun   | da Fonseca et al. 2019 |
| MR           | Meuse-Rhine-Yssel     | The Netherlands   | 4           | 777K chip | Upadhyay et al. 2017   |
| MRO          | Maronesa              | Portugal          | 6           | shotgun   | da Fonseca et al. 2019 |
| MT           | Maltese               | Malta             | 4           | 777K chip | Upadhyay et al. 2017   |
| PA           | Pajuna                | Spain             | 6           | 777K chip | Upadhyay et al. 2017   |
| PRE          | Preta                 | Portugal          | 6           | shotgun   | this study             |
| RO           | Romanian grey         | Romania           | 4           | 777K chip | Upadhyay et al. 2017   |
| SA           | Sayaguesa             | Spain             | 5           | 777K chip | Upadhyay et al. 2017   |
| WP           | White Park            | England           | 3           | 777K chip | Upadhyay et al. 2017   |

Table S5: Top candidate regions from bovine selection scan, computing 1 score per SNP. Gene annotations were extracted from the Human Gene Nomenclature Committee (HGNC) and the Vertebrate Gene Nomenclature Committee (VGNC). We labeled windows with particularly low coverage in the target population, as the signal of selection may be inflated in those windows for that reason.

| BRANCH(ES) | CHR | START     | END       | BEST POSITION(S)      | MAXIMUM SCORE | GENES (HGNC)            | GENES (VGNC)                                                | NOTES        |
|------------|-----|-----------|-----------|-----------------------|---------------|-------------------------|-------------------------------------------------------------|--------------|
| MA-B       | 7   | 31139786  | 31656058  | 31239786              | 15.955        | N/A                     | <i>CSNK1G3, CEP120</i>                                      |              |
| BK-C       | 16  | 68131085  | 68331085  | 68231085              | 15.955        | N/A                     | <i>HMCN1</i>                                                |              |
| HOL-P      | 10  | 38352236  | 38552236  | 38452236              | 15.955        | N/A                     | <i>UBR1, TMEM62, CCNDBP1, EPB42</i>                         |              |
| BU-E       | 4   | 90338939  | 90538939  | 90438939              | 15.955        | N/A                     | N/A                                                         |              |
| BRA-AA     | 14  | 43030034  | 43230034  | 43130034              | 15.654        | N/A                     | N/A                                                         |              |
| FL-I       | 6   | 89409731  | 89609731  | 89509731              | 13.564        | N/A                     | <i>ADAMTS3</i>                                              |              |
| EL-O       | 21  | 13575619  | 13775619  | 13675619              | 13.322        | N/A                     | N/A                                                         | low coverage |
| MIR-CC     | 1   | 22756273  | 22956273  | 22856273              | 12.643        | N/A                     | N/A                                                         |              |
| BU-E       | 6   | 39795259  | 39995259  | 39895259              | 12.327        | N/A                     | N/A                                                         |              |
| S-Q        | 16  | 32083264  | 32283264  | 32183264              | 12.095        | <i>KIF26B</i>           | <i>SMYD3</i>                                                |              |
| DF-RR      | 13  | 39876995  | 40076995  | 39976995              | 11.932        | N/A                     | <i>RIN2, CRNKL1, CFAP61</i>                                 |              |
| LM-EEE     | 6   | 12117949  | 12317949  | 12217949              | 11.91         | N/A                     | <i>UGT8</i>                                                 |              |
| MT-CCC     | 2   | 10248519  | 10448519  | 10348519              | 11.852        | N/A                     | N/A                                                         |              |
| KC-M       | 1   | 29992983  | 30192983  | 30092983              | 11.766        | N/A                     | N/A                                                         |              |
| DF-RR      | 24  | 10629225  | 10829225  | 10729225              | 11.708        | N/A                     | N/A                                                         |              |
| MA-B       | 15  | 43161704  | 43361704  | 43261704              | 11.52         | N/A                     | <i>SBF2</i>                                                 |              |
| MER-EE     | 16  | 10597064  | 10797064  | 10697064              | 11.365        | N/A                     | N/A                                                         |              |
| EEE-CC     | 6   | 12117949  | 12317949  | 12217949              | 11.257        | N/A                     | <i>UGT8</i>                                                 |              |
| MER-EE     | 1   | 74866383  | 75066383  | 74966383              | 11.199        | N/A                     | <i>ATP13A5, HRASLS</i>                                      |              |
| KC-M       | 2   | 110048350 | 110248350 | 110148350             | 11.103        | N/A                     | N/A                                                         |              |
| CCIBR-II   | 18  | 19615837  | 19815837  | 19715837              | 11.073        | N/A                     | <i>SALL1</i>                                                |              |
| RO-F       | 17  | 38455167  | 38655167  | 38555167              | 10.932        | N/A                     | N/A                                                         |              |
| GW-S       | 16  | 20402906  | 20602906  | 20502906              | 10.924        | N/A                     | <i>USH2A, ESRRG</i>                                         |              |
| BK-C       | 15  | 45459239  | 45659239  | 45559239              | 10.834        | <i>OVCH2, PPF1BP2</i>   | <i>CYB5R2</i>                                               |              |
| BS-I       | 12  | 46363654  | 46563654  | 46463654              | 10.811        | N/A                     | N/A                                                         |              |
| GW-S       | 16  | 32083264  | 32283264  | 32183264              | 10.804        | <i>KIF26B</i>           | <i>SMYD3</i>                                                |              |
| MA-B       | 8   | 53567800  | 53882133  | 53667800;<br>53782133 | 10.757        | N/A                     | <i>GNA14, GNAQ</i>                                          |              |
| MT-CCC     | 8   | 71550088  | 71750088  | 71650088              | 10.736        | <i>ENTPD4, SLC25A37</i> | <i>NKX3-1, NKX2-6</i>                                       |              |
| CH-A       | 26  | 35786475  | 35986475  | 35886475              | 10.725        | <i>ATRNL1</i>           | <i>TRUB1</i>                                                |              |
| EL-O       | 1   | 130658644 | 130858644 | 130758644             | 10.638        | N/A                     | <i>KPNA6, RBP1, TXLNA, RBP2, COPB2, MRPS22</i>              |              |
| DAM-AAA    | 10  | 78830979  | 79030979  | 78930979              | 10.63         | N/A                     | <i>GPHN</i>                                                 |              |
| RO-F       | 8   | 86936023  | 87136023  | 87036023              | 10.613        | N/A                     | <i>ZNF169, SPTLC1</i>                                       |              |
| MR-S       | 16  | 72485715  | 72685715  | 72585715              | 10.595        | N/A                     | <i>RPS6KC1, ANGEL2, VASH2, SPATA45, TATDN3, NSL1, BATF3</i> |              |
| MIR-CC     | 21  | 53764830  | 53964830  | 53864830              | 10.491        | N/A                     | N/A                                                         |              |
| CCC-D      | 2   | 10248519  | 10448519  | 10348519              | 10.452        | N/A                     | N/A                                                         |              |
| BK-C       | 15  | 43569293  | 43769293  | 43669293              | 10.385        | N/A                     | <i>SBF2, WEE1, IPO7</i>                                     |              |
| MR-S       | 4   | 38360883  | 38560883  | 38460883              | 10.325        | N/A                     | N/A                                                         |              |
| MT-CCC     | 26  | 27532931  | 27732931  | 27632931              | 10.289        | N/A                     | <i>SORCS1</i>                                               |              |
| GW-S       | 5   | 11395138  | 11595138  | 11495138              | 10.279        | N/A                     | N/A                                                         | low coverage |
| BRA-AA     | 2   | 44270382  | 44470382  | 44370382              | 10.271        | N/A                     | <i>ARL5A, NEB</i>                                           |              |
| BU-E       | 4   | 30182568  | 30382568  | 30282568              | 10.24         | <i>DNAH11</i>           | <i>SP4</i>                                                  |              |
| AA-Z       | 14  | 43030034  | 43230034  | 43130034              | 10.194        | N/A                     | N/A                                                         |              |
| MT-CCC     | 7   | 25472570  | 25672570  | 25572570              | 10.131        | N/A                     | <i>CHSY3, KIAA1024L, ADAMTS19</i>                           |              |
| DAM-AAA    | 9   | 32434348  | 32634348  | 32534348              | 10.088        | N/A                     | <i>FAM184A, MCM9, ASF1A</i>                                 |              |
| WP-O       | 14  | 48680437  | 48880437  | 48780437              | 10.079        | N/A                     | <i>EXT1, MED30</i>                                          |              |
| CCIBR-II   | 5   | 6754684   | 6954684   | 6854684               | 10.001        | N/A                     | N/A                                                         |              |

Table S6: Top candidate regions from bovine selection scan, computing score in windows of 10 SNPs with a step size of 1 SNP. Gene annotations were extracted from the Human Gene Nomenclature Committee (HGNC) and the Vertebrate Gene Nomenclature Committee (VGNC).

| BRANCH(ES) | CHR | START    | END      | BEST POSITION(S) | MAXIMUM SCORE | GENES (HGNC)                                                                                                                                                     | GENES (VGNC)                                                                                                                                                                                                                                                                                                                                                                                                                                |
|------------|-----|----------|----------|------------------|---------------|------------------------------------------------------------------------------------------------------------------------------------------------------------------|---------------------------------------------------------------------------------------------------------------------------------------------------------------------------------------------------------------------------------------------------------------------------------------------------------------------------------------------------------------------------------------------------------------------------------------------|
| RO-F       | 7   | 50851861 | 55066221 | 52810086         | 4.665         | <i>FAM13B, BRD8, SMIM33, NRG2, PCDHA3, PCDHA6, PCDHA11, PCDHB1, PCDHB4, PCDHB6, PCDHB7, PCDHB16, PCDHB14, PCDHGA3, PCDHGB1, PCDHGB2, PCDHGA5, PCDHGA7, ARAP3</i> | <i>KLHL3, HNRNPA0, PKD2L2, WNT8A, NME5, KIF20A, CDC23, GFRA3, CDC25C, FAM53C, KDM3B, REEP2, EGR1, ETF1, HSPA9, CTNNA1, LRRTM2, SIL1, PAIP2, SLC23A1, MZB1, PROB1, DNAJC18, TMEM173, UBE2D2, CXXC5, PSD2, PURA, CYSTM1, PFDN1, HBEGF, SLC4A9, SRA1, APBB3, SLC35A4, CD14, TMCO6, IK, WDR55, DND1, HARS, HARS2, ZMAT2, TAF7, REL2, PCDH1, DELE1, RNF14, GNPDA1, NDFIP1, ZNF608, CSNK1G3, CEP120, PRDM6, PPIC, SNX24, SNX2</i>                 |
| MA-B       | 7   | 30014797 | 32458116 | 31691420         | 4.511         | N/A                                                                                                                                                              | <i>TRPS1</i>                                                                                                                                                                                                                                                                                                                                                                                                                                |
| MT-CCC     | 14  | 51034878 | 52622208 | 51623748         | 3.641         | N/A                                                                                                                                                              | <i>SCP2, ZYG11A, ZYG11B, COA7, SHISAL2A, GPX7, ZCCHC11, PRPF38A, ORC1, CC2D1B, ZFYVE9, ZFYVE9, BTF3L4, BTF3L4, TXNDC12, RAB3B, NRDC, OSBPL9, EPS15, TTC39A, RNF11, CDKN2C, FAF1, DMRTA2, ELAVL4</i>                                                                                                                                                                                                                                         |
| HE-G       | 3   | 94028894 | 97100382 | 95726532         | 3.461         | N/A                                                                                                                                                              | <i>PHF24, VCP, FANCG, PIGO, STOML2, FAM214B</i>                                                                                                                                                                                                                                                                                                                                                                                             |
| DAM-AAA    | 8   | 57274558 | 59955508 | 57999794         | 3.379         | <i>TLE1</i>                                                                                                                                                      | <i>GPR37, POT1</i>                                                                                                                                                                                                                                                                                                                                                                                                                          |
| BU-E       | 4   | 89770514 | 91520720 | 90278376         | 3.263         | N/A                                                                                                                                                              | <i>TRPS1</i>                                                                                                                                                                                                                                                                                                                                                                                                                                |
| CCC-D      | 14  | 51034878 | 52277825 | 51623748         | 3.231         | N/A                                                                                                                                                              | N/A                                                                                                                                                                                                                                                                                                                                                                                                                                         |
| MT-CCC     | 2   | 10211900 | 11248899 | 10730400         | 3.185         | <i>FSIP2</i>                                                                                                                                                     | N/A                                                                                                                                                                                                                                                                                                                                                                                                                                         |
| LM-EEE     | 6   | 11322043 | 12843517 | 11882822         | 3.156         | N/A                                                                                                                                                              | <i>NDST4, UGT8, ARSJ, THBS1, FSIP1, GPR176, EIF2AK4, SRP14, BMF, BUB1B, ANKRD63, PLCB2, DISP2, KNSTRN, IVD, BAHD1, CHST14, CCDC32, RPUSD2, RAD51, RMDN3, GCHFR, DNAJC17, ZFYVE19, SPINT1, VPS18, DLL4, CHAC1, INO80, EXD1, CHP1, OIP5, NUSAP1, NDUFAF1, RTF1, ITPKA, RPAP1, TYRO3, MGA, MAPKBP1, SPTBN5, SPTBN5, EHD4, PLA2G4D, PLA2G4F, VPS39, TMEM87A, GANC, CAPN3, ZNF106, SNAP23, HAUS2, CDAN1, TTBK2, UBR1, TMEM62, CCNDBP1, EPB42</i> |
| HOL-P      | 10  | 35129080 | 39547706 | 37761286         | 3.131         | <i>CCDC9B, C15orf62, PLA2G4E</i>                                                                                                                                 | <i>N/A</i>                                                                                                                                                                                                                                                                                                                                                                                                                                  |
| FL-I       | 11  | 56815844 | 57798139 | 57361016         | 3.127         | N/A                                                                                                                                                              | N/A                                                                                                                                                                                                                                                                                                                                                                                                                                         |
| EEE-CC     | 6   | 11322043 | 12589046 | 11819996         | 3.004         | N/A                                                                                                                                                              | <i>NDST4, UGT8</i>                                                                                                                                                                                                                                                                                                                                                                                                                          |

Table S7: Area of sampling and sample sizes of Atlantic cod population panels analyzed in this study (see Figure S23).

| Area         | Population           | Abbreviation | Sample size |
|--------------|----------------------|--------------|-------------|
| US           | Cape Cod             | Cco          | 6           |
| Nova Scotia  | Western Bank         | Web          | 5           |
| Nova Scotia  | Sable Bank           | Sab          | 5           |
| Newfoundland | Trinity Bay          | Tri          | 4           |
| Newfoundland | Southern Grand Banks | Sgb          | 4           |
| Greenland    | Greenland            | Gre          | 11          |
| Iceland      | Iceland              | Ice          | 61          |
| Norway       | Barents Sea          | Bar          | 8           |
| Faroes       | Faroe Plateau        | FarP         | 8           |
| Faroes       | Faroe Bank           | FarB         | 5           |
| Celtic Sea   | Celtic Sea           | Cel          | 8           |
| North Sea    | North Sea            | Nse          | 12          |
| Baltic Sea   | Baltic West          | BalW         | 8           |
| Baltic Sea   | Baltic East          | BalE         | 8           |
| Russia       | White Sea            | Whi          | 8           |



Table S8: Long high-differentiation regions in the Codfish data. Branches with corresponding scores with  $-\log_{10}(P) > 5$  for at least 1 SNP inside the region were placed into the column 'SIGNAL STRONG IN...'.

| LINKAGE GROUP | START  | END    | SIGNAL STRONG IN...                           | SIGNAL ALSO PRESENT IN..                                                                            |
|---------------|--------|--------|-----------------------------------------------|-----------------------------------------------------------------------------------------------------|
| LG01          | 9.1Mb  | 26.1Mb | Iceland-I; BarentsSea-L                       | Greenland-J; J-H; K-I; M-K; N-J; N-M; O-N; Q-O                                                      |
| LG02          | 18.5Mb | 24Mb   | M-K; N-J; N-M; O-N; FaroePlateau-O; Iceland-I | NorthSea-S; S-Q; Q-O; K-I; L-K; CelticSea-S; C-B; FaroeBank-P; I-H; P-O                             |
| LG07          | 13.7Mb | 23Mb   | M-K; N-J; N-M; O-N; Iceland-I; K-I            | A-R; B-A; BalticWest-T; C-B; P-O; Q-O; S-Q; T-Q; CelticSea-S; FaroeBank-P; FaroePlateau-O; H-R; I-H |
| LG12          | 0.5Mb  | 13.4Mb | CelticSea-S; Q-O; S-Q                         | Iceland-I; M-K; N-J; N-M; NorthSea-S; O-N                                                           |
